# Supplementary material for: The KASH5 protein involved in meiotic chromosomal movements is a novel dynein activating adaptor
Source: eLife journal article supplement (doi:10.7554/elife.78201), 2022-06-15
Supplement: data1 [file elife-78201-data1-v2.zip]

# White-HRP exposure merged images

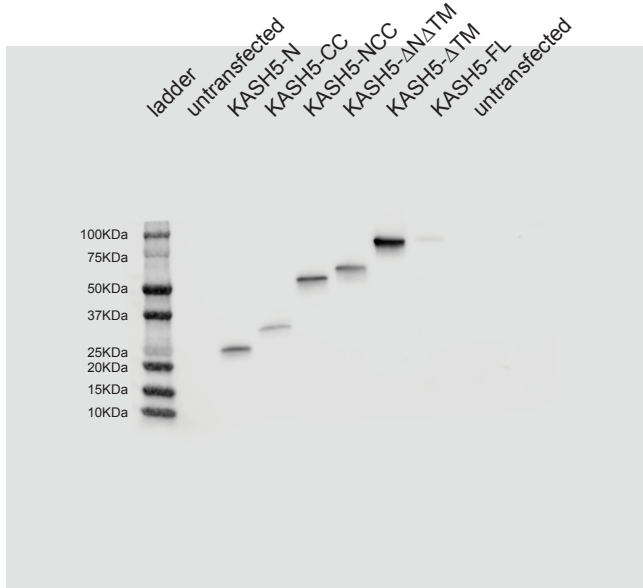

Input- anti FLAG

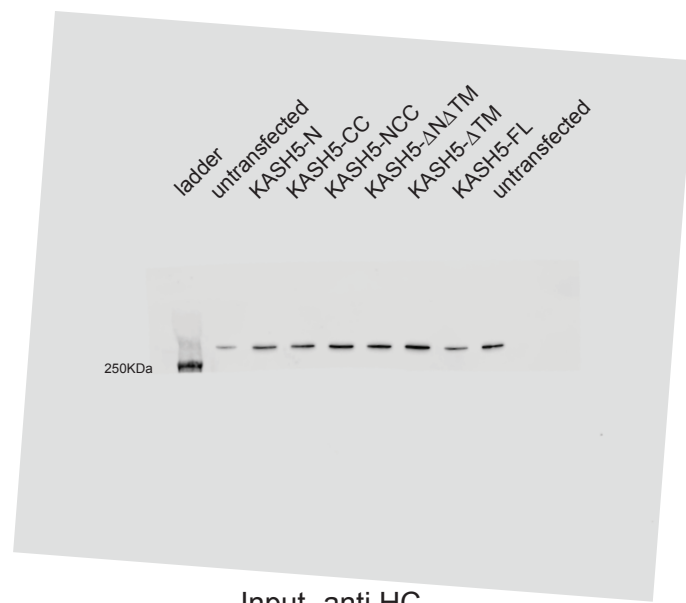

Input- anti HC

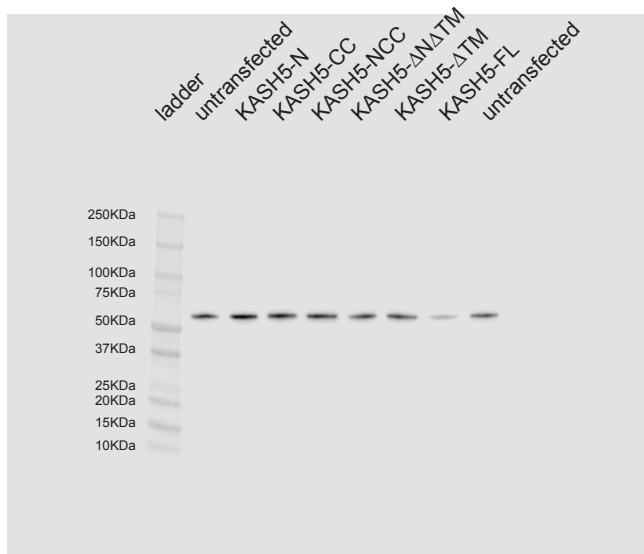

Input- anti LIC

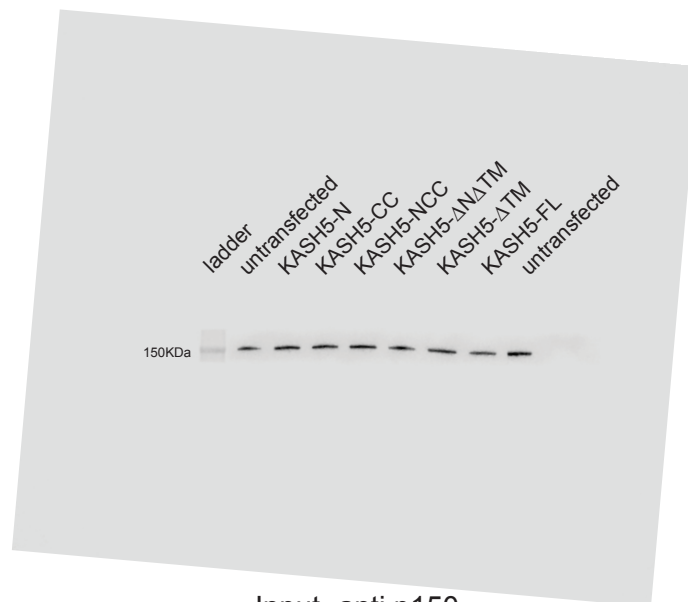

Input- anti p150

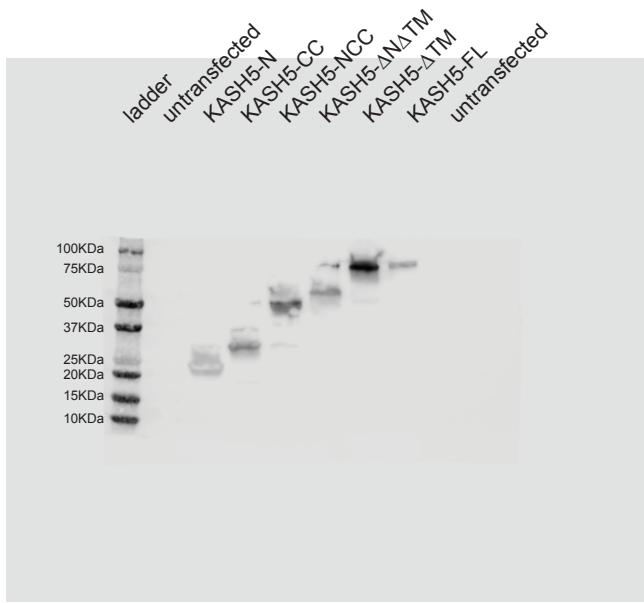

IP-anti FLAG

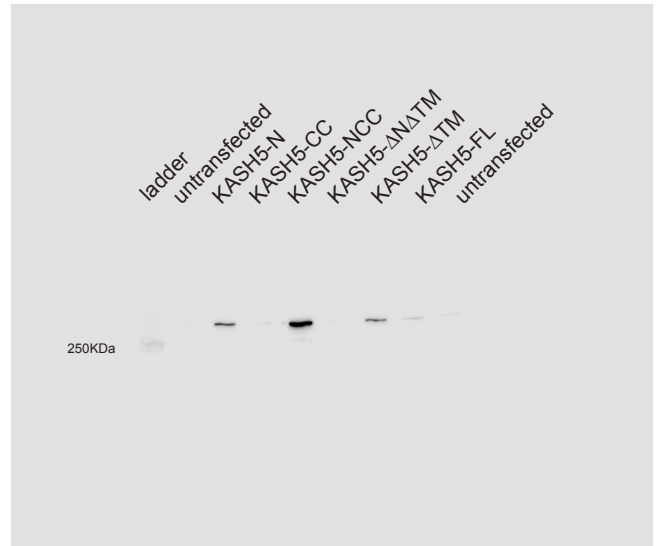

IP- anti HC

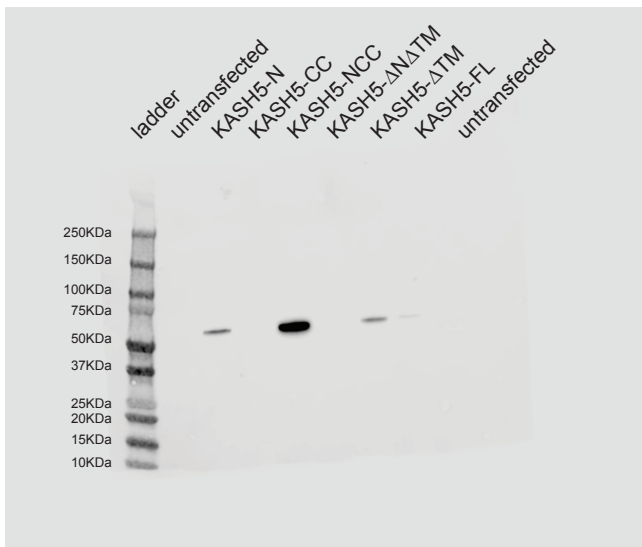

IP- anti LIC

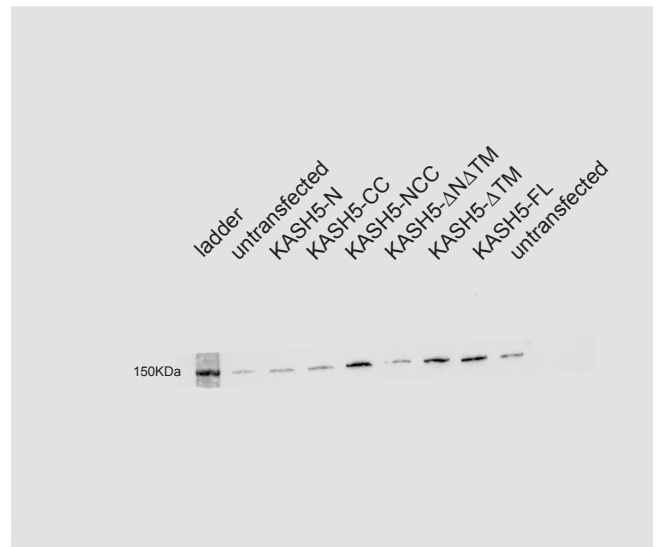

IP- anti p150
