# Supplementary material for: The KASH5 protein involved in meiotic chromosomal movements is a novel dynein activating adaptor
Source: eLife journal article supplement (doi:10.7554/elife.78201), 2022-06-15

Precision plus unstained protein ladder  
50ng BSA  
100ng BSA  
200ng BSA  
400ng BSA  
1uL Dynein  
2uL Dynein

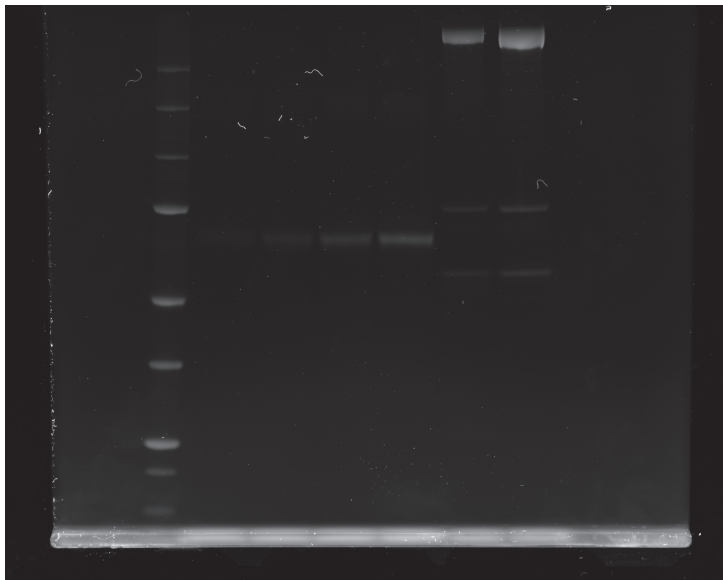

Precision plus unstained protein ladder  
50ng BSA  
100ng BSA  
200ng BSA  
400ng BSA  
2uL Dynactin  
4uL Dynactin

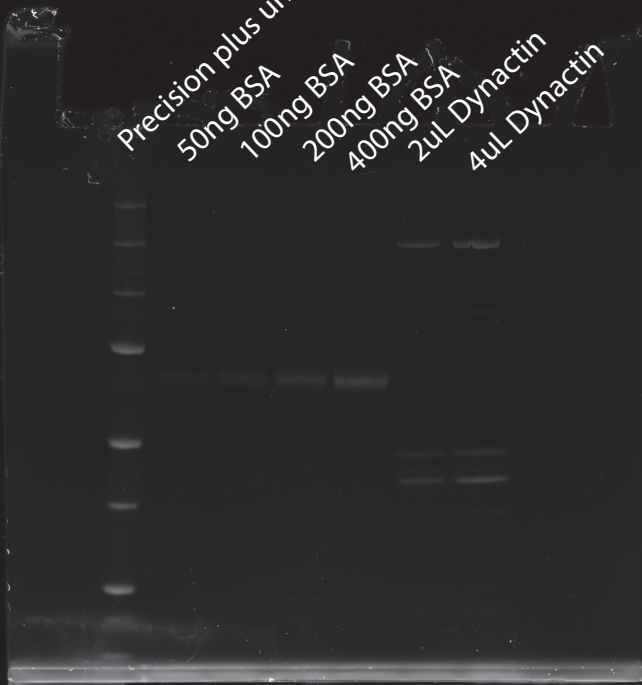

Precision plus unstained protein ladder  
50ng BSA  
100ng BSA  
200ng BSA  
400ng BSA  
unrelated to this study  
unrelated to this study  
3uL KASH5  
2uL KASH5  
1uL KASH5

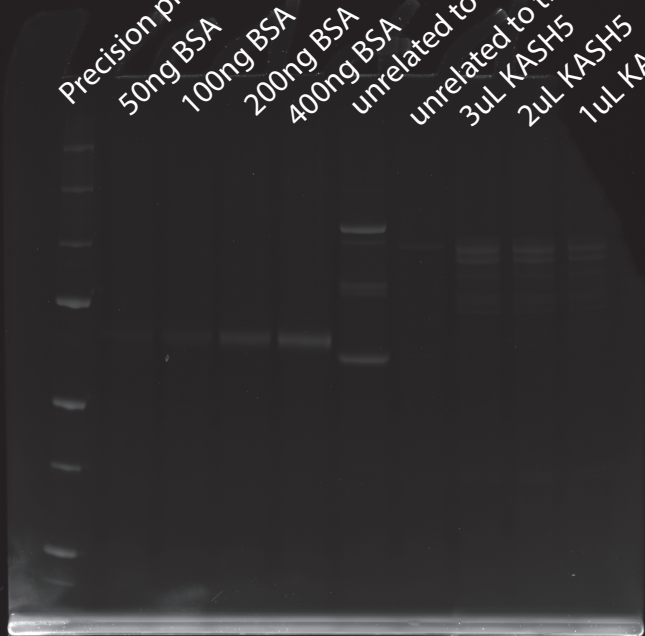

Supplement: data1 [file elife-78201-data1-v2.zip]
