# Supplementary material for: The KASH5 protein involved in meiotic chromosomal movements is a novel dynein activating adaptor
Source: eLife journal article supplement (doi:10.7554/elife.78201), 2022-06-15
Supplement: data1 [file elife-78201-data1-v2.zip]

Membrane + marker

membrane

Membrane (intensified)

No GFP  
WT  
L147D  
F167D  
M171D

No GFP  
WT  
L147D  
F167D  
M171D

No GFP  
WT  
L147D  
F167D  
M171D

GFP

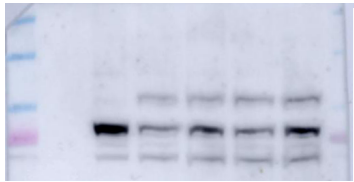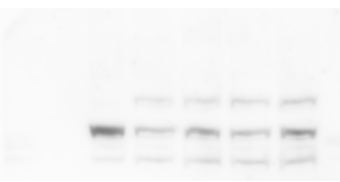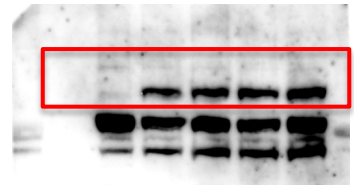

$\beta$ -ACTIN

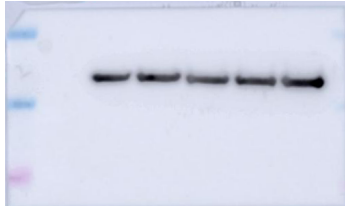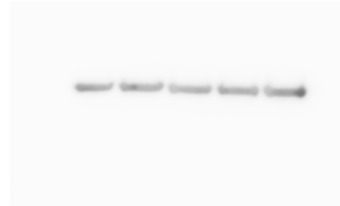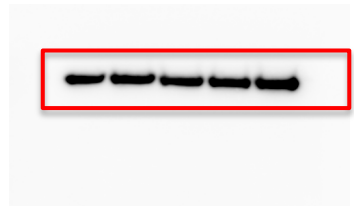

Red box indicates region shown in figure
