# Supplementary material for: The KASH5 protein involved in meiotic chromosomal movements is a novel dynein activating adaptor
Source: eLife journal article supplement (doi:10.7554/elife.78201), 2022-06-15

Not relevant to this study

Fig. 1D

Input

GSH beads  
LIC +

GST-N GST-CC GST-NCC LIC

GST-N GST-CC GST-NCC

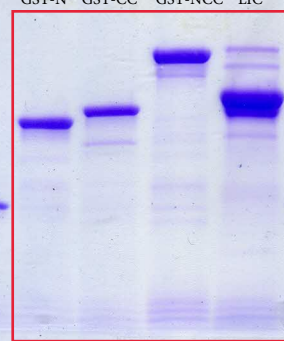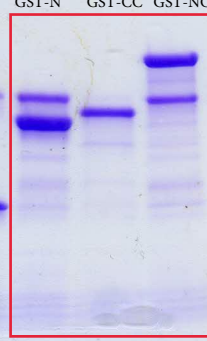

Not relevant to this study

Not relevant to this study



Fig.1E

NCC\_LIC1\_complex\_gel1

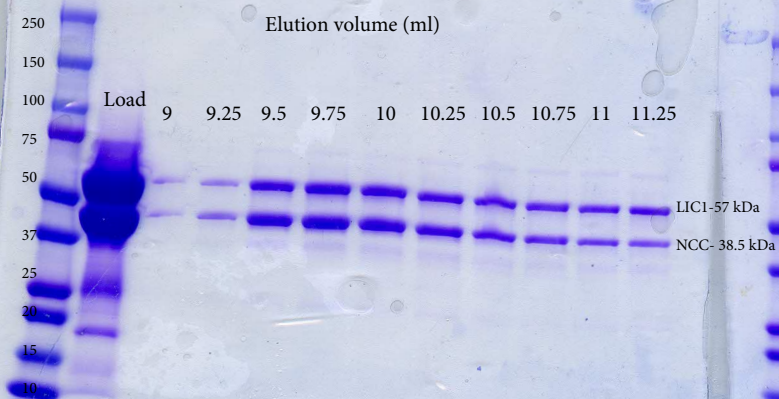

Not relevant to this study

Fig.1E

NCC\_LIC1\_complex\_gel2

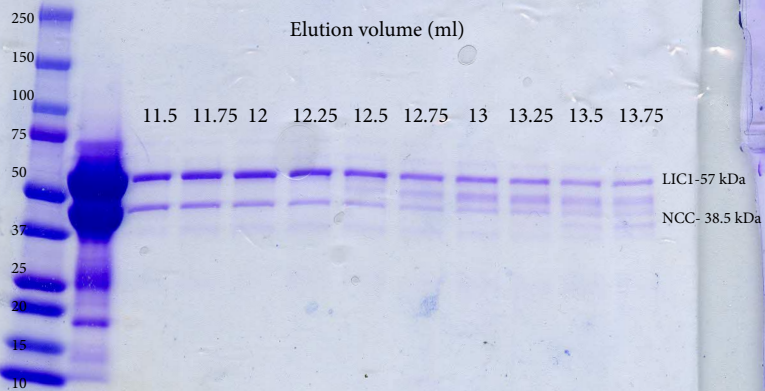

Not relevant to this study

Not relevant to this study



Fig.1F\_ KASH5-NCC\_LICF477AF478A\_no complex

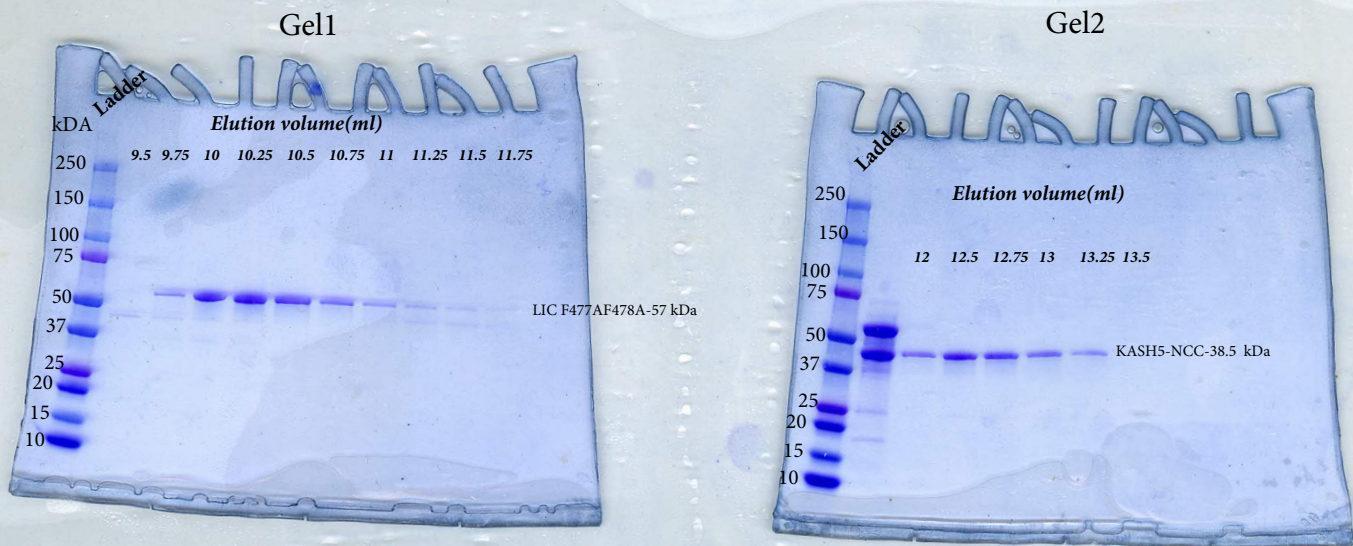

Supplement: data1 [file elife-78201-data1-v2.zip]
