# Supplementary material for: The KASH5 protein involved in meiotic chromosomal movements is a novel dynein activating adaptor
Source: eLife. 2022 Jun 15;11:e78201. doi: 10.7554/eLife.78201 (PMC9242646; doi:10.7554/eLife.78201)
Supplement: Figure 3—figure supplement 1—source data 1. [file elife-78201-fig3-figsupp1-data1.xlsx]

## Sheet: Figure 3-supp-1A
Figure 3S1A Run Lengths ( μm )
BicD2	KASH5-ΔTM	KASH5-NCC
6.123	5.54367	8.51144
3.82044	3.23985	8.80739
4.10869	3.16779	4.73685
3.60425	8.49558	5.69894
6.34327	3.52779	7.69724
3.24378	1.29588	2.44245
6.99215	2.30382	7.10519
5.47836	1.43985	2.14635
3.24378	3.45588	3.8487
5.26217	4.61658	2.44245
4.25297	4.11167	4.14025
5.47836	2.59694	2.0724
2.09045	3.17391	3.99659
2.45077	2.88535	3.18255
3.17171	3.46248	4.44074
3.53203	8.36763	1.70235
2.52299	3.17391	3.10844
2.66712	4.4723	4.5979
3.31584	4.61658	3.70803
5.338	8.43985	1.70565
6.06554	3.82311	4.74627
1.87741	2.88535	2.29895
3.17721	5.69863	2.66979
4.40479	2.16409	0.964137
6.13776	1.73124	1.70565
5.12683	3.17391	1.85401
1.01092	5.69863	2.81815
7.7985	5.19372	2.81815
2.74389	2.45265	4.44969
2.59945	1.22633	1.11234
1.94963	5.62657	2.44732
11.2646	1.37061	2.22485
7.43756	0.793478	1.26071
5.12683	3.31819	3.11472
1.37202	4.18389	3.11472
3.03277	2.38043	3.31521
7.00424	0.937761	3.89172
4.18813	0.793478	8.07168
4.18813	1.87552	2.30617
13.792	5.41006	18.0892
2.52739	5.40049	4.75647
1.51646	5.32858	5.47726
3.24943	6.55271	4.54028
2.09407	2.73635	1.58554
2.09407	3.16826	3.89172
1.08314	4.03239	2.30617
2.67167	2.23223	2.88268
1.15536	2.80826	11.0266
1.87741	2.3762	4.97266
0.07222	1.51222	1.94586
1.58853	2.16016	5.18901
1.66075	2.80826	1.80173
3.24943	2.66429	1.22523
0.28888	1.44016	2.16205
3.32165	2.3762	4.75647
3.74508	6.20825	3.02696
6.26587	1.66027	2.52236
17.2849	3.03198	1.72967
4.39333	5.34192	3.24315
5.25746	1.87694	6.12583
6.04968	2.23788	4.32409
3.02492	0.938389	2.52236
3.16889	3.03198	3.38398
2.5927	3.10405	8.28002
3.38492	2.16566	5.68795
3.74508	2.59882	2.80795
1.9446	2.09344	5.61605
3.81714	2.81532	2.44794
3.31301	0.794106	5.40001
2.80873	1.37155	4.17604
3.52905	3.53721	5.18398
1.29635	1.29933	4.17604
2.3046	4.04259	2.37227
1.9446	1.51599	2.65974
2.5927	3.46499	2.94736
7.05809	4.04259	3.01927
2.66476	1.51599	3.37864
3.24095	8.59041	2.94736
11.4513	5.26971	3.01927
2.52079	2.88754	3.30673
1.87254	2.09344	1.79718
3.38492	2.87985	1.43765
2.08857	3.16779	2.58783
1.65651	3.52779	5.10391
1.22429	4.6797	2.73164
2.37667	2.01588	2.80355
2.37667	4.89557	6.90093
3.74508	4.6797	4.67263
4.2492	2.30382	3.23483
3.16889	2.87985	4.38501
5.61762	3.5997	3.09102
2.52079	3.81573	3.23483
3.45698	4.3916	1.65337
1.87254	2.37588	2.01274
1.65651	5.25558	2.51593
3.02492	3.88763	3.538
1.58444	1.43985	3.75466
3.09682	3.09573	3.61022
0.864285	5.18367	2.96039
2.01651	2.59176	2.81595
7.92222	2.37588	2.09391
3.31301	2.80779	1.58853
3.16889	1.72794	7.25842
3.67301	2.15985	3.95263
6.69793	1.43985	2.80276
9.57873	2.08779	4.09644
2.3046	3.02382	3.01832
1.00825	2.01588	3.88073
8.71444	2.37588	2.15592
7.56222	2.37588	3.3777
1.08032	2.01588	1.94727
1.15238	2.94642	2.3079
4.60936	1.6529	2.23584
4.53604	2.7307	3.75042
4.24811	3.73676	2.38012
3.8881	3.5931	1.80314
5.11208	3.73676	2.23584
2.73604	3.44945	3.53407
4.24811	5.53331	1.65415
7.34415	2.7307	7.47979
5.61605	5.67712	1.72606
4.68001	2.94642	1.79812
5.90414	2.51514	2.01384
7.56018	2.94642	5.12056
6.12017	1.94021	5.69737
2.52001	1.6529	8.14956
5.25605	2.7307	4.11089
3.38414	3.01817	3.9666
2.16001	3.5931	2.0914
2.73604	4.74297	2.95694
3.45604	1.86846	1.58664
5.61605	2.22767	4.74234
3.67207	2.87451	2.65864
3.1681	3.01817	2.22752
2.8081	5.03028	3.08976
3.60001	1.86846	3.952
8.20812	1.94021	2.29927
3.24001	1.79655	2.94595
4.75208	1.86846	4.09566
1.7281	1.86846	2.65864
3.02413	3.52763	1.72449
2.01604	7.91908	0.503028
3.1681	2.37572	16.9576
1.58397	2.73572	1.79639
3.45604	3.6716	2.0837
1.7281	2.08779	2.94595
2.4481	3.02366	7.5068
0.576033	4.53542	5.84652
1.36983	2.59176	3.39246
5.04676	2.87969	3.7534
5.9839	2.37572	3.68118
1.7303	1.94382	6.71269
2.88378	1.07985	7.00141
3.02806	1.79985	5.63002
7.13753	3.95954	4.1864
3.67694	3.02366	5.05257
5.33517	2.66366	2.08433
0.93729	1.29588	2.30005
2.59552	3.09557	3.16245
0.93729	2.30366	1.22193
14.4913	3.66407	5.12464
3.46059	2.37086	3.10373
16.0774	3.73597	2.16534
2.37918	3.59216	3.46452
5.40724	3.08929	2.30978
5.62343	3.1612	2.67057
1.7303	2.51451	3.10373
4.75836	2.51451	2.30978
12.4726	6.25048	2.74279
3.02806	2.80198	2.02106
5.19089	5.02918	2.59835
2.5233	3.23294	2.23756
2.01871	3.59216	1.94083
17.4473	6.32239	2.08465
7.49801	3.87963	2.73164
3.17218	2.80198	1.50955
2.956	2.73007	0.790809
13.1936	2.37086	2.37227
2.30712	4.74171	3.73801
1.2257	1.65243	4.09739
5.62343	2.01164	2.01274
2.66759	4.59806	1.72527
5.55136	2.65832	9.25641
3.17218	2.1553	2.74797
4.75836	2.65832	3.68809
6.34453	4.89746	1.80785
7.28166	2.08857	2.531
6.56072	3.45698	1.80785
12.1121	5.25762	2.74797
7.57007	2.73682	2.96495
1.58617	2.95286	3.95342
1.58617	3.60111	6.39728
5.04676	1.80048	2.73149
1.51395	3.45698	2.01258
2.09077	2.01667	6.20433
1.94664	2.73149	4.04008
3.82107	4.31295	7.07002
1.7303	2.65974	5.8437
5.69565	2.08465	3.75151
2.09077	2.44402	3.75151
2.01871	2.51593	3.39073
1.2257	2.65974	1.7314
0.793007	2.80339	3.53501
1.15348	2.30021	5.8437
3.749	3.09102	3.0301
10.0698	1.72527	2.95788
3.5964	1.79702	5.41085
2.51749	2.80339	4.25643
3.02099	1.79702	8.19116
3.52449	1.43765	1.86814
3.23813	5.60694	2.15561
1.87458	2.30021	4.31122
2.01886	4.67248	2.73039
1.87458	1.86893	2.15561
8.21942	1.43765	3.16151
2.95615	2.15655	1.50893
6.99372	2.2283	2.44292
4.54232	3.23467	3.52073
9.15671	5.97369	3.52073
4.25392	4.0305	2.44292
2.73981	1.87128	2.22752
1.80252	4.31844	9.81705
14.2757	3.23875	7.65155
12.9059	3.5986	17.6851
4.75851	5.32607	7.36283
4.10963	1.79938	1.949
2.88393	2.3751	14.2203
3.38869	1.15159	2.74295
1.44205	1.94335	2.09328
22.8556	3.09478	1.58805
8.57989	1.51144	2.382
5.55168	2.95097	4.76417
4.39804	6.18973	4.9579
5.04692	5.54194	3.08976
3.46075	7.34132	2.58673
2.52346	3.16685	1.65258
6.4169	4.24638	3.23341
4.32598	2.23113	7.25717
3.82122	3.95844	5.38903
13.9152	1.43953	4.74234
6.9215	1.65541	2.51483
4.4701	1.29556	8.33497
2.88393	2.51906	2.73039
2.73981	5.63065	2.80229
9.15671	6.56919	2.15561
1.44205	9.60102	2.37117
1.94664	5.84731	2.65864
2.09093	4.8367	2.22752
2.88393	5.48637	5.02981
5.40739	8.15725	1.58083
3.89344	2.88754	1.94005
1.80252	4.54782	3.80819
1.36983	2.7431	5.82015
9.99792	5.19764	6.56637
2.59552	2.95976	11.3288
3.38869	7.43536	4.83466
4.75851	9.88974	3.5358
4.10963	7.79631	15.2254
1.65823	7.14664	2.88629
4.10963	4.76448	1.65965
3.02822	5.41415	4.97894
2.23505	8.01297	2.742
1.51411	2.95976	15.947
2.52346	2.95976	3.89658
3.2444	4.90876	3.17501
1.2257	4.2591	3.10279
18.6737	2.02122	3.31929
2.16299	3.60943	2.02043
3.74916	3.82593	1.80393
1.08142	4.17118	3.52308
0.865227	8.12663	2.08512
1.65823	5.24992	2.15043
0.648881	1.22256	1.8694
1.15364	2.58909	1.94131
0.93729	3.81165	6.25535
1.15364	4.24308	2.15702
0.865227	2.7329	1.94131
3.10028	5.4658	6.85823
2.23505	3.59593	3.17642
1.00935	1.86987	3.17014
5.11914	3.52402	2.81548
2.23505	3.45196	5.48652
1.15364	3.23624	2.52676
2.16299	2.8048	3.17642
10.0394	1.86987	4.90908
4.98365	2.08559	3.39308
14.4453	11.291	2.38232
8.3783	5.03421	4.62035
13.7229	3.81165	3.46515
5.70585	2.51718	5.63096
5.05587	4.69304	1.86861
5.85029	6.49807	10.2775
7.58373	2.8158	2.08433
7.43929	4.3321	4.0966
6.64487	5.12636	3.37801
6.35583	3.7545	6.03712
9.60604	3.1769	3.37801
16.6842	10.1804	2.65927
10.4728	4.18766	2.58736
5.85029	3.3934	2.15608
2.52786	3.97116	12.4809
1.87788	7.1479	8.51301
5.63363	3.03246	3.60723
11.3395	2.59929	5.69941
4.33351	4.47654	4.7615
11.4117	2.52707	5.41085
4.33351	4.25988	2.52503
4.62255	5.12636	2.95788
5.77807	6.49807	2.74153
7.00597	5.34287	2.8136
3.32243	2.74373	2.74153
7.94483	2.31041	2.66931
5.41697	4.3321	1.51505
7.07819	2.30146	1.44283
3.03355	5.75358	2.52503
6.86153	5.46596	1.51505
3.97241	4.02752	1.58711
6.06695	2.30146	7.54448
4.18907	4.81864	2.80229
2.734	1.86987	2.51483
3.59734	2.44528	4.74234
4.82037	16.2539	1.43702
7.33849	7.76742	1.86814
7.12262	2.08575	3.52073
3.52528	5.32214	2.44292
5.10815	1.29462	1.86814
11.799	2.08575	1.0059
4.1729	3.7399	1.0059
6.76293	4.17133	2.65848
3.02178	1.72606	1.65258
5.61181	2.22956	1.43702
4.6764	4.53102	1.86814
7.26643	2.15765	7.85
8.70549	2.15765	12.403
8.63343	3.66799	5.181
5.89959	3.2364	6.437
9.13709	3.7399	5.652
3.16559	3.2364	4.03961
5.46784	2.58909	4.11167
7.19452	2.08575	2.88535
2.30225	1.65415	1.94758
8.56152	2.30146	1.37061
4.82037	3.7399	1.8033
4.24481	2.15765	2.45265
3.52528	1.29462	2.669
4.96418	7.2903	4.81927
5.10815	4.61957	1.87018
2.59003	6.64063	2.37368
4.24481	5.19701	6.83343
8.05787	6.1354	3.09306
8.27374	3.9699	3.52465
2.44622	5.05273	1.29478
7.26659	4.04212	3.16496
8.56152	8.51741	2.30178
8.41771	7.00157	2.15796
7.12262	4.33085	2.30178
4.89228	5.34145	3.09306
2.66194	9.81674	2.08606
2.52472	2.382	4.17196
5.89959	11.6211	2.73337
4.38862	2.52629	3.16496
4.6764	4.25878	3.88418
6.18737	4.25878	2.80528
3.2375	6.20762	0.431593
1.72669	4.74454	1.5824
4.96418	10.4956	6.92558
3.09368	8.12318	6.27623
3.16559	3.81008	4.18421
6.90674	10.9988	3.60708
11.5833	1.29399	3.24629
5.32403	3.95373	3.10201
6.90674	3.59436	4.18421
1.79859	2.37227	3.02994
1.87065	3.73817	4.03992
6.97865	2.58799	3.53485
3.59734	3.16308	6.70908
2.734	4.96026	1.87568
2.08637	4.24136	3.46279
5.10815	1.15018	2.95772
3.52528	8.05143	2.09203
3.66925	4.74454	5.25087
1.72669	6.54172	3.81227
2.87781	2.44418	2.22987
3.38147	3.95373	5.17896
4.6045	4.60073	8.41583
4.24481	4.02564	2.5894
11.5112	2.0129	1.5824
2.8059	2.22846	1.72637
2.66194	3.45055	4.96308
6.25928	2.22846	1.94209
2.44622	5.46344	5.68246
4.69053	4.24136	3.81227
9.52535	3.01267	1.94209
5.91717	2.80355	1.15081
9.45313	3.09117	1.5824
2.95866	2.22846	2.66146
5.12354	3.16308	1.43859
11.4737	4.96026	2.014
5.4121	3.09117	5.91655
10.5356	2.80355	5.33941
6.13368	1.86909	3.46342
4.32975	1.29399	3.75199
8.15427	2.30036	5.33941
7.07175	2.44418	3.75199
9.02012	2.30036	2.59756
2.59788	2.15655	2.52535
6.78318	2.15655	3.6077
11.6902	2.44418	2.74185
6.71096	2.94736	2.23678
7.50476	1.65337	2.38106
6.49446	1.94099	1.87599
7.72126	6.64094	3.75199
3.68024	11.4051	2.02028
5.77289	10.9719	5.91655
7.72126	3.898	3.24692
9.16456	3.39261	2.87389
6.71096	5.63033	3.16135
3.24723	2.52644	3.16135
4.54625	5.84684	3.95153
4.04102	3.03167	5.81968
3.03073	2.45422	4.59822
7.2658	4.54766	4.81378
7.04993	5.34161	4.95743
12.733	2.02122	2.37101
6.61834	2.15624	2.15545
4.31624	2.58752	3.44866
5.82705	5.53425	1.50877
4.24434	3.01864	2.51467
3.88465	3.52182	4.62177
7.55343	2.80308	3.82735
5.3234	2.22814	2.59976
7.2658	6.18125	4.69399
2.4459	6.3249	4.98287
1.29494	6.18125	1.87756
5.82705	5.31869	3.46625
5.61118	3.44992	2.31088
1.9424	2.22814	1.58868
2.66178	3.09055	3.1053
5.75499	3.09055	2.31088
4.38815	3.01864	1.80534
2.8775	3.73739	2.94579
2.9494	2.80308	4.59822
5.61118	3.16245	1.79624
5.68309	1.79686	3.52057
3.23718	1.29368	4.95743
3.59687	7.33111	1.58068
8.41677	11.2842	6.75367
4.96371	3.30626	2.0118
1.87034	3.59373	2.0118
2.08622	4.88741	1.65243
2.374	10.1022	1.36512
3.45306	4.47387	2.15545
2.15812	5.91702	1.86799
3.74084	3.24707	2.2272
2.01431	5.8448	1.43702
7.19374	4.25737	4.59822
4.60403	3.03073	3.59232
4.17243	2.30916	3.5369
3.30909	2.81422	2.16534
4.24434	3.9688	4.83607
2.73368	3.24707	3.46468
3.45306	9.5971	4.33085
2.23003	2.81422	4.69163
5.3234	1.65965	4.1864
2.23003	2.95851	2.59851
2.01431	2.81422	2.45407
1.29494	5.19544	3.03151
2.8775	3.17501	2.45407
2.73368	1.51536	4.6001
4.68959	2.30916	9.05639
8.87427	2.742	3.88135
9.52362	2.5255	7.76255
5.84401	1.44314	2.80308
3.10232	4.95822	1.5813
8.80205	2.58689	1.29384
5.84401	4.23963	2.44371
5.98829	7.25764	2.65942
7.50334	2.58689	1.86877
6.34908	2.94626	1.5813
6.34908	2.44323	2.65942
11.3272	5.53315	1.86877
6.2048	2.58689	1.94068
5.48323	1.00606
2.45297	4.67075
2.45297	6.17983
4.18452	5.67681
5.69973	3.44913
6.78193	5.82062
5.33894	6.97033
6.27686	2.44323
4.32896	5.03012
3.89595	5.26766
6.42114	4.54609
4.61753	5.41195
9.59568	5.77273
4.53903	3.60802
3.10232	3.82452
4.97816	6.35002
5.84401	7.36032
11.3995	8.37045
4.90609	3.10279
6.34908	4.11309
10.9665	4.69038
9.01855	3.17501
10.1728	5.05116
3.2466	3.68008
4.68959	4.54609
8.58554	4.40181
6.99843	2.81422
4.90609	3.46373
3.89595	14.4485
3.31882	4.31295
12.1209	3.16292
4.68959	2.58783
4.31577	6.32569
9.7822	6.82887
4.1718	2.15655
1.94209	2.73149
11.4367	2.08465
9.2787	3.37848
10.5735	3.5942
1.5105	2.08465
4.31577	1.86893
2.73321	4.88804
5.89818	4.16929
2.15781	1.36574
0.719217	3.37848
1.36668	2.44402
1.65431	3.80976
3.16481	2.01274
3.30877	17.6832
2.30178	5.4132
3.0929	6.35159
4.45958	5.62971
6.97708	4.76369
3.66831	5.4132
4.0999	9.74373
2.5894	4.18625
19.0611	9.96039
14.2418	5.84621
6.90517	4.90798
7.62439	6.71238
3.52449	7.65077
3.88418	5.70193
4.6753	5.99065
2.37368	19.4154
6.83327	7.0011
4.96308	3.53658
6.61739	2.67057
6.40168	3.82531
5.82627	3.1758
3.66831	8.12208
2.5894	4.74391
8.7752	2.65942
0.935092	4.38454
3.52449	5.67822
3.5964	2.80323
3.0929	2.80323
4.81927	3.95326
3.88418	3.80945
2.44559	4.81582
3.16481	2.01258
2.44559	1.65321
3.81227	2.65942
3.74021	2.44386
10.3578	3.30626
1.94209	2.30005
2.014	8.69717
2.66131	2.87514
3.38068	2.80323
1.007	3.37817
0.79128	2.37196
0.935092	9.30853
0.79128	8.00967
2.51749	9.01996
1.22272	6.27796
6.54549	4.11309
9.42267	7.5046
1.5105	5.48417
1.43859	5.98924
13.1965	3.60802
5.62468	3.10279
4.68724	4.18531
6.34578	4.7626
8.50909	2.81422
4.83152	3.03073
9.66288	14.8798
6.12944	3.73786
3.67773	3.73786
3.3171	2.51593
8.58131	3.95357
2.30759	6.68506
4.90358	7.47587
5.11993	5.46313
4.68724	2.65974
3.24503	2.65974
3.3171	3.01911
5.91309	6.54141
20.047	8.05096
8.94178	2.08465
18.6769	3.66611
17.7394	2.65974
7.06688	5.03185
11.1052	3.37848
8.79765	12.0764
7.28323	5.96631
8.58131	2.58783
18.4605	4.88804
8.72543	2.73149
10.384	1.79702
4.7593	3.88167
4.54295	1.29384
8.36496	1.22209
7.06688	6.4695
6.92276	3.09102
11.7869
4.59979
3.95295
10.9244
2.87483
8.69639
3.73723
11.9306
5.67775
13.0806
4.0966
4.16851
7.61827
9.12767
2.73117
6.82777
3.09039
2.65927
5.606
6.82777
11.8587
4.81535
1.43749
1.00621
3.09039
2.29989
7.54652
8.33701
2.94673
2.22799
5.82156
1.79671
2.65927
5.67775
5.74965
5.17472
4.24041
4.24041
4.67169
9.84641
3.88104
6.10903
5.53409
2.65927
1.22177
2.94673
4.0966
3.80913
5.89347
5.606
5.96537
2.80292
3.44976
2.80292
5.03091
3.09039
3.66548
6.39649
1.86861
5.31853
2.22799
1.86861
3.30611
5.39028
3.09039
2.44355
4.0966
4.74344
3.16229
3.73723
5.31853
3.73723
3.80913
3.37801
2.3718
3.73723
2.22799
3.44976
8.19336

## Sheet: Figure 3-supp-1B
Figure 3S1B % Processive events
BicD2	KASH5-ΔTM	KASH5-NCC
83.7037	78.6667	69.1824
92.4324	68.6957	55.814
89.6552	74.3363	67.5214
88.9328	70	63.1944

## Sheet: Figure 3-supp-1C
Figure 3 S1 C Landing Rate (events μm-1 min-1)
	BicD2	KASH5-ΔTM	KASH5-NCC
	0.433843	0.440473	0.205044
	0.49598	0.247819	0.117254
	1.02287	0.380264	0.224253
	0.669996	0.296862	0.220243

## Sheet: Figure 3-supp-1E
	Figure 3S1E Run Lengths ( μm )
	Dynein/Dynactin/Kash5-ΔTM	Dynein/Dynactin/Kash5-ΔTM/Lis1	Dynein/Dynactin	Dynein/Dynactin/Lis1
	4.23225	6.38864	4.71565	2.50289
	17.0298	2.51671	4.91284	3.75623
	2.50085	0.774324	4.04573	4.1415
	8.46434	6.00148	2.69726	3.5628
	6.44438	3.48461	2.98614	3.5628
	9.29314	2.61358	1.83863	3.36906
	3.94368	4.2591	3.94761	1.82889
	8.84915	2.03268	5.00673	2.88911
	5.57884	2.90387	2.31308	2.3112
	3.7512	1.20246	1.25302	4.33367
	4.90547	1.27327	5.20785	7.51732
	3.08222	4.5271	6.0759	3.66485
	2.98583	9.75818	6.1723	2.21684
	2.69695	6.18344	2.60714	3.27706
	2.79319	5.79691	14.5415	1.25302
	4.71958	6.28	1.73344	2.41246
	1.34847	3.18836	4.33351	4.04463
	4.23806	6.18344	6.74111	4.62239
	4.3343	4.44436	3.38947	8.59873
	5.58653	2.22218	3.67992	6.18894
	3.17847	5.89347	7.2512	3.57803
	2.40791	4.63747	3.19055	4.35581
	4.52694	2.22218	1.83564	2.80716
	1.90943	1.15945	1.83564	3.67835
	1.48506	4.34764	1.25223	2.78989
	2.1217	4.92744	2.31182	3.75199
	1.83878	1.64253	3.46766	2.8943
	8.37674	4.63747	1.92608	3.47315
	9.33962	3.47818	1.63563	4.14857
	4.33289	4.54091	1.25066	8.21974
	5.48825	2.99509	6.07009	5.10423
	4.23649	1.69481	2.11966	2.60023
	1.348	5.79079	3.85404	2.79287
	2.40712	3.88402	8.67237	3.85011
	4.91049	3.03654	7.03423	6.54533
	11.1691	1.34172	2.98708	2.69506
	2.40712	2.04791	1.93534	2.02137
	5.19937	2.04791	1.3502	4.23523
	7.60649	3.53093	2.41262	3.17642
	0.674001	3.46028	2.60557	2.60698
	4.85931	1.20058	2.7935	3.47598
	1.97192	3.36734	1.8336	11.3693
	5.01097	5.67633	2.50431	17.4393
	1.83093	2.59756	2.79319	3.85404
	3.08364	3.84838	2.70982	6.10463
	3.95106	5.86866	1.93565	3.87602
	1.92733	9.04367	3.46609	0.870251
	1.3491	4.52176	2.79209	2.5142
	3.46923	7.50429	10.8889	5.96521
	2.6982	18.3759	3.56547	4.32959
	3.95106	6.63843	4.62538	11.1756
	6.45647	2.59756	1.54174	3.37676
	3.08364	2.50148	1.44833	2.79303
	2.02373	1.92419	3.18647	5.39138
	4.2401	5.58009	2.60714	5.87274
	3.08364	2.98253	8.30404	4.5249
	3.56547	5.9649	4.81126	2.69569
	2.9874	2.69381	2.21323	3.75607
	4.65772	4.81048	9.33396	2.40775
	5.57507	5.67633	6.25472	2.9841
	1.976	7.21572	3.37189	3.37032
	4.33147	4.42567	8.67268	1.92592
	5.1978	3.75214	3.75811	1.73328
	0.770085	3.75214	3.18004	3.18349
	2.85347	4.52176	2.79287	4.91536
	5.39028	4.04071	1.6372	1.25302
	1.82889	5.29153	24.9374	2.40948
	1.73265	7.69677	2.79224	3.3733
	2.21386	3.75214	2.022	4.91536
	2.8877	5.67633	2.50337	2.80433
	2.02185	8.08158	1.63688	1.6361
	3.75497	6.49085	1.82936	4.32912
	3.94745	5.57366	4.33273	3.36702
	1.05912	3.80992	15.9948	10.8707
	6.16194	2.68109	9.53916	9.04289
	3.46609	5.43251	1.83078	5.57962
	6.35457	3.59828	3.56516	2.59741
	6.45082	3.10436	1.63798	4.52254
	5.29545	5.64431	2.02891	4.83073
	4.71769	1.5521	7.32028	4.44436
	2.69585	2.04602	10.9804	2.70527
	2.59961	2.04602	1.92639	2.80182
	1.44424	3.95091	11.0767	11.8935
	10.1094	4.58597	1.05944	4.04479
	5.19921	4.09205	5.97181	4.43007
	1.348	2.18717	1.44471	4.14119
	1.92561	3.52763	3.3711	4.04479
	3.85121	8.25475	4.4307	2.31135
	1.63672	5.00924	2.79319	6.83766
	6.83594	3.66878	2.89178	3.75591
	17.4267	4.43541	2.03645	1.73752
	3.75497	4.91755	3.87727	4.52662
	3.17721	2.12123	1.5419
	10.7834	3.18192	4.04746
	4.42897	10.5099	2.31292
	30.521	3.18192	2.02373
	5.77682	9.25641
	6.6433	14.656
	2.69585	8.58146
	2.59961	2.98912
	5.58433	2.50698
	2.69585	2.60337
	2.40697	2.89257
	3.56233	5.68889
	0.962881	2.21762
	3.56233	1.82811
	2.40697	2.11667
	4.04385	2.88645
	3.56233	2.7902
	3.65873	1.25082
	2.59961	3.46373
	3.94745	14.0474
	12.9016	10.1026
	3.17721	1.92435
	5.48794	4.32975
	0.962881	10.4874
	2.50337	2.11667
	4.62145	5.86913
	0.866483	3.36749
	2.31073	8.37077
	3.94525	9.0443
	3.46421	7.02371
	3.94525	2.30916
	2.30947	3.65622
	3.94525	2.50164
	3.36859	5.38808
	4.42724	4.71455
	3.75356	2.30916
	8.662	3.76565
	3.27235	3.37942
	8.85449	2.99321
	2.40618	14.8695
	2.98363	5.11742
	3.27235	4.24842
	2.6949	1.9311
	3.17611	2.51043
	2.89414	3.08976
	1.83298	8.59339
	5.69172	4.04087
	3.9553	4.61815
	6.55993	3.94478
	1.73642	1.15458
	5.40237	5.0992
	2.31308	4.90688
	4.9152	7.98565
	6.16806	1.82811
	7.61372	6.83107
	3.18035	19.6274
	1.83109	5.58041
	3.75874	5.29169
	4.52961	1.3469
	3.46954	5.29169
	2.98771	2.02043
	2.40948	2.69396
	2.89131	5.67649
	2.31308	2.98253
	13.1072	8.8515
	4.33697	3.36749
	5.30063	5.00312
	2.31308	4.23335
	3.27675	2.02043
	1.44566	11.9304
	2.31418	3.27125
	4.14606	2.69396
	5.01395	3.84854
	2.6106	7.40836
	3.73958	23.5721
	7.90652	8.94774
	2.89257	2.30916
	10.1243	5.38793
	6.26744	10.2948
	2.50698	0.962096
	8.19587	3.46373
	2.75174	2.88645
	2.89257	2.11667
	11.8598	2.02232
	1.90504	5.00783
	3.08552	13.8888
	11.0884	6.45239
	5.01395	10.4342
	15.813	6.54863
	3.76046	6.54863
	6.26744	1.92608
	3.56751	10.4972
	18.8022	5.48935
	2.69977	8.18582
	1.25349	14.7346
	2.40634	4.33367
	1.44377	6.16351
	2.50258	4.81519
	2.40634	6.16351
	11.0694	9.82302
	1.82889	8.66734
	5.67916	10.8823
	2.11762	8.18582
	4.42771	3.94839
	2.88597	9.53414
	12.1213	11.1713
	10.3896	4.33367
	3.46326	4.91159
	7.11885	8.37846
	9.62017	10.6898
	1.92403	2.82003
	2.88597	6.76811
	2.78989	3.94839
	3.75183	3.03151
	3.46326	9.53414
	2.02028	2.1856
	7.02261	6.16351
	3.81212	2.98536
	1.53923	4.81519
	1.73155	5.9222
	5.97432	4.14103
	5.49249	4.15956
	3.56531	3.17799
	5.01065	7.99318
	5.58889	6.93657
	2.79444	7.22561
	1.90598	5.00971
	6.35976	8.28536
	2.11997	4.1426
	2.32941	5.49139
	4.81802	3.56468
	2.11997	3.85357
	1.69419	4.04636
		8.5744
		9.53775
		5.39515
		3.75732
		2.60118
		5.10611
		1.34879
		3.75732
		6.3585
		6.2621
		11.5609
		5.00971
		7.80368
		3.94996
		4.91331
		2.89021
		3.85357
		4.72068
		5.49139
		4.52804
		16.7634
		6.84018
		2.69757
		5.00971
		4.3354

## Sheet: Figure-3-supp-1F
Figure 3S1F % Processive events
Dynein/Dynactin/Kash5-ΔTM	Dynein/Dynactin	Dynein/Dynactin/Kash5-ΔTM/Lis1	Dynein/Dynactin/Lis1
42.9412	5.34125	66.4557	4.54545
46.1078	7.87879	62.0915	7.5
24.5734	4.36893	36.4706	4.66667
42.1053	2.7907	48.3222	6.89655
29.2181	9.23077	42.1687	5.78947
39.1705	6.0241	55.0388	7.61421
