# Supplementary material for: The KASH5 protein involved in meiotic chromosomal movements is a novel dynein activating adaptor
Source: eLife. 2022 Jun 15;11:e78201. doi: 10.7554/eLife.78201 (PMC9242646; doi:10.7554/eLife.78201)
Supplement: Figure 3—source data 1. [file elife-78201-fig3-data1.xlsx]

## Sheet: Figure 3C
Figure 3C Velocity (μm/s)
BicD2	KASH5-ΔTM	KASH5-NCC
0.765532	0.493294	0.564258
0.792536	0.7065	0.583726
0.380882	0.394698	0.275378
0.872292	0.389988	0.254654
0.708384	0.35796	0.265644
0.471	0.176468	0.383708
0.823308	0.335038	0.793164
0.852196	0.27318	0.758938
0.883282	0.579644	0.583098
0.996636	0.467232	0.471
0.80541	0.308662	0.37366
0.852196	0.49141	0.382138
0.700534	0.55264	0.7065
0.561746	0.546046	0.346342
0.363612	0.45687	0.342574
0.37523	0.460952	0.28888
0.4396	0.531288	0.5495
0.374916	0.256224	0.556094
0.656574	0.608846	0.581528
0.762706	0.437402	0.249002
0.79913	0.875746	0.379312
0.51025	0.418562	0.512448
0.460638	0.393756	0.23079
0.47885	0.269098	0.226708
0.355762	0.579644	0.28888
0.474454	0.51182	0.761764
0.081326	0.56363	0.795362
0.213206	0.7065	0.662854
0.28417	1.0676	0.724712
0.3768	0.48513	0.204728
0.4239	0.322164	0.43175
0.569596	0.126856	0.3768
0.64684	0.230162	0.48513
0.484502	0.195308	0.50711
0.372718	0.404746	0.29987
0.471	0.398466	0.390302
0.14915	0.157	0.458126
0.395954	0.216032	0.36267
0.700534	0.24021	0.2512
0.705558	0.406002	0.743552
0.686718	0.872292	0.351366
0.471	0.346656	0.662854
0.543534	0.391558	0.2355
0.202216	0.852196	0.460638
0.606962	0.293904	0.446194
0.174584	0.925358	0.386534
0.5809	0.9734	0.212892
0.717804	0.8164	0.593146
0.340062	0.240838	0.240838
0.011304	0.4396	0.242094
0.22294	0.942	0.5652
0.176154	0.680438	0.290764
0.441484	0.351994	0.172072
0.057148	0.21666	0.19625
0.481362	0.383708	0.41448
0.742296	0.710582	0.694254
0.487956	0.802584	0.578388
0.724712	0.286682	0.342574
0.736644	0.749518	0.831158
0.763962	0.32656	0.785
0.314	0.463464	0.60759
0.412282	0.059032	1.57
0.727224	0.4396	0.492038
0.403804	0.422016	1.0318
0.36895	0.3925	0.62015
0.388732	0.513704	0.874804
0.652178	0.606962	0.499888
0.43803	0.765218	0.42704
0.451532	0.575562	0.51182
0.48984	0.314	0.628
0.66882	0.641188	0.481048
0.245862	0.3768	0.413852
0.2512	0.488584	0.383708
0.223254	0.599426	0.297986
0.389674	0.837438	0.585296
0.539766	0.606334	0.82425
0.414794	0.599426	0.421702
0.415736	0.889562	0.389988
0.616382	0.55892	0.454672
0.732562	1.1417	0.57776
0.291706	0.337236	0.603822
0.546674	0.897098	0.3925
0.479164	0.265644	1.1304
0.267528	0.512762	0.857534
0.762706	0.850312	0.5966
0.796932	0.366438	0.395012
0.493294	0.5338	0.320594
0.44117	0.453416	0.51025
0.597542	0.346342	0.831158
0.321222	0.837438	0.547302
0.360158	1.04656	0.435518
2.198	0.723456	0.471
0.3768	0.709326	0.32813
0.680438	0.942	0.325618
0.802584	0.818598	0.343516
0.27475	0.997264	0.5495
0.160768	0.369264	0.494864
0.374916	0.422016	0.490782
0.471	0.579644	0.6437
0.628	0.538196	0.298614
0.319966	1.0362	0.233616
0.225766	0.680438	0.329072
0.383708	0.269098	0.440542
0.8007	0.247746	0.539766
0.233616	0.418562	0.437402
0.5966	0.9106	0.617324
0.837438	0.8792	0.4396
0.4396	1.099	0.652178
0.499888	0.33441	0.362356
0.716862	0.740098	0.614812
0.151976	0.488584	0.157
0.295474	0.715292	0.40192
0.15229	0.451532	0.608532
0.899296	0.459068	0.466604
0.97497	0.466604	1.0362
0.546988	0.628	1.57
0.53066	0.742296	0.540708
0.47728	0.579644	0.252142
0.661598	0.335666	0.401292
0.628	0.243664	0.518414
0.597228	0.751716	0.443368
0.600368	0.429238	0.302068
0.715292	0.578388	0.517158
0.646526	0.715292	1.06163
0.650922	0.77087	0.468174
0.610416	0.424842	0.622348
0.849056	0.628	0.639304
0.7379	0.52752	1.07922
0.523438	0.490468	0.700534
0.426098	0.3768	0.559862
0.471	0.340062	0.6908
0.401606	0.405688	0.592204
0.390616	0.5024	0.387162
0.3454	0.321536	0.695196
0.48984	0.610416	0.449962
0.38308	0.544162	1.07953
0.688288	0.325932	0.717804
0.403804	0.785	0.536312
0.43175	0.628	0.43646
0.837438	0.388732	0.341632
0.732562	0.732562	0.327502
0.517158	0.822366	0.157
0.575562	0.493294	0.779976
0.6908	0.628	0.201274
0.396582	0.5338	0.260306
0.17113	0.4553	0.367694
0.237384	0.694254	0.403176
0.069708	0.286682	0.416992
0.459068	0.43489	0.421702
0.628	0.3925	0.398152
0.130938	0.33441	0.457498
0.067824	0.471	0.912484
0.132194	0.168304	0.60916
0.628	0.461894	0.445252
0.6908	0.595658	0.44431
0.616068	0.155116	0.467546
1.10654	0.446822	0.413852
0.04396	0.332526	0.40192
0.403804	0.562688	0.25591
0.291706	0.528776	0.314
0.751402	0.616068	0.398152
0.717804	0.246804	0.900238
0.526578	0.453416	0.523438
0.323734	0.461894	0.7536
0.327188	0.385906	0.37209
0.35482	0.55264	0.484188
0.114296	0.578388	0.329386
0.545418	0.523438	0.40192
0.571794	0.267842	0.459068
0.8792	0.556722	0.191226
0.837438	0.709012	0.628
0.687032	0.882968	0.226394
0.244292	1.30844	0.33912
0.6908	0.55264	0.505854
1.0205	0.346028	0.28417
0.65783	0.437402	1.3188
0.858162	0.213206	0.203158
0.746378	0.471	0.398466
0.528776	0.560176	0.466604
0.593146	0.515902	0.397838
0.569596	0.586238	0.488584
0.611358	0.590948	0.3768
0.653434	0.683264	0.446508
0.418562	0.523438	0.662854
0.339748	0.774638	0.500516
0.32499	0.5338	0.523438
0.417306	0.22765	0.406944
0.51967	0.396582	0.14287
0.76459	0.636792	0.397838
0.633966	0.74575	0.402234
0.22294	0.990356	0.750774
0.383708	0.826448	0.635222
0.378998	0.560804	0.459068
0.6594	0.471	0.628
0.535684	0.79913	0
0.2826	0.2983	0
0.406002	0.724712	0.844032
0.289822	0.252456	1.35271
0.652806	0.35639	0.267528
0.505854	0.28103	0.620464
0.976854	0.378998	0.388732
0.166734	0.725968	0.371148
0.265644	0.720316	0.527206
0.386534	0.295474	0.418562
0.35482	0.28731	0.46629
0.619208	0.132194	0.877002
0.713722	0.436146	0.471
0.732562	0.284798	0.415422
0.50711	0.327188	0.452788
0.341946	0.369264	0.842148
0.335666	0.480106	0.994438
0.628	0.081012	0.51025
0.676356	0.680438	0.628
0.680438	0.214776	0.649666
0.361728	0.063428	0.459068
0.476966	0.448706	0.724712
0.676984	0.572736	0.383708
1.099	0.523438	0.366438
0.664738	0.766474	0.178038
0.336922	1.03432	0.732562
0.542278	0.51025	0.699278
0.436146	0.672902	0.355762
0.8635	0.487328	0.226394
0.36738	0.37366	0.871664
0.942	0.540394	0.519984
0.426098	0.490468	1.099
0.279146	0.41448	0.970574
0.26847	0.358902	0.446194
0.448706	0.652178	0.687346
0.82268	0.435518	0.373032
0.84937	0.82425	0.758938
0.447764	0.402234	0.767416
0.91217	0.729736	0.265644
0.372404	0.493294	0.90118
0.418562	0.421388	0.90275
0.646526	0.383708	0.465662
0.54793	0.661598	0.45216
0.538196	0.463464	0.451218
0.369892	0.616696	0.7065
0.50083	0.330642	0.368636
0.510878	0.141614	0.436146
0.353878	0.403804	0.6908
0.418562	0.732562	0.457812
0.2983	0.742296	0.700534
0.411026	0.634908	0.426098
0.099538	1.01862	0.874804
0.076302	0.416992	0.628
0.479164	1.10716	0.575562
0.314	0.795362	1.0563
0.523438	0.545732	0.463464
0.242094	0.5024	0.511192
0.413224	0.732562	0.150092
0.229534	0.56834	0.385278
0.808236	0.779662	0.426726
0.275692	0.858162	0.747948
0.447136	0.874176	0.71435
0.41448	0.443368	0.880456
0.617324	0.4239	0.584354
0.802584	0.478222	0.732562
0.372718	0.493294	0.57619
0.366438	0.490782	0.738842
0.190912	0.69708	0.481362
0.212578	0.677612	1.0318
0.732562	0.559862	0.518728
0.307092	0.314	0.963666
0.172072	0.44117	0.892388
0.86507	0.517158	0.727224
0.314	0.448706	0.364868
0.371148	0.504284	0.7222
0.362356	0.379312	0.586238
0.471	1.10873	0.654062
0.232988	0.790338	0.5495
0.11775	0.090432	0.233616
0.050868	0.17113	0.586866
0.053694	0.979052	0.429552
0.071906	0.74104	0.498632
0.289822	0.628	0.35482
0.39721	0.681694	0.428296
0.9734	0.436146	0.302696
0.488584	0.16014	0.764904
0.71906	0.961468	0.600682
0.463464	0.685148	0.417934
0.111784	0.415736	1.0205
0.214148	0.532544	0.917822
1.1191	0.4082	0.499574
0.7222	0.4553	0.767416
0.45844	0.947966	0.628
0.758938	0.785	0.86821
0.994438	0.756426	1.15144
0.775266	0.457812	0.590948
1.04656	0.658458	1.67456
0.8478	0.911542	0.874804
0.40192	0.583098	0.453416
0.80855	0.495806	0.670076
0.996008	0.342888	0.827704
0.746692	1.36056	0.5966
0.68452	0.321222	0.410084
0.895528	0.851568	0.561118
0.929126	0.958642	0.922218
0.747948	0.527206	0.264074
1.099	0.595658	0.59503
1.0205	0.393442	0.672902
0.680438	0.399722	0.417934
0.47414	0.471	0.756112
0.58875	0.335666	0.654062
0.936034	0.845288	0.516844
0.471	0.97497	0.796932
0.773068	0.405374	0.692684
0.738842	0.7065	0.4396
0.676984	0.801328	0.476966
0.57776	0.243664	0.70179
0.959584	0.40192	0.453416
0.523438	0.942	0.542278
0.831786	0.717804	0.43018
0.8792	0.433006	0.411968
0.96241	0.47728	0.261562
0.822366	0.676356	0.27475
0.694254	0.528776	0.34697
0.700534	0.584354	0.22294
0.518728	0.51025	0.82425
0.713722	0.32342	0.6123
0.914682	0.806352	0.523438
0.744808	0.788768	0.406316
0.722828	0.606962	0.897098
0.59189	0.400664	0.127484
0.89176	0.7065	0.236756
0.78029	0.35011	0.48513
0.867268	0.628	0.583098
0.776836	0.587494	0.27475
0.52752	0.221684	0.628
0.765532	0.9734	0.414794
0.637734	0.82425	0.212264
0.546674	0.409456	0.369264
0.633338	0.324676	0.35482
1.07671	0.355762	0.302068
0.572108	0.64213	0.67039
0.79756	0.308034	0.740098
0.300498	0.471	0.677612
0.418562	0.665052	0.807294
0.923474	0.479164	0.976854
0.717804	0.32813	0.5966
0.70493	0.20096	0.358902
0.553582	0.418562	0.33912
0.451846	0.224196	0.542278
0.66882	0.297358	0.523438
0.451532	0.495492	0.628
0.342888	0.80384	0.258108
0.332526	0.437716	0.489212
0.54479	0.5652	0.4082
0.676356	0.556094	0.398466
0.70807	0.595658	0.532544
0.66725	0.467546	0.643072
0.737586	0.308348	0.66882
0.66725	1.12286	0.628
0.633338	1.38443	0.336922
0.971516	0.509308	0.418562
0.970574	0.968062	0.229848
0.46472	0.677926	0.478536
0.440856	0.304894	0.6751
0.628	0.683264	0.4553
0.684206	0.646526	0.520298
0.637734	0.402862	0.542278
0.771498	0.74104	0.575562
0.294532	0.57462	1.54143
0.18369	0.45059	0.6123
0.747006	0.520926	0.072534
0.562688	0.695824	0.363612
0.727224	0.639932	0.913426
0.81483	0.889562	0.942
0.639932	0.942	0.700534
0.446822	0.66411	0.506482
0.837438	0.628	0.415736
0.413224	0.43175	0.449962
0.8164	0.563002	0.9106
0.676984	0.43489	0.599426
0.747634	0.373346	0.586238
0.5966	0.314	1.099
0.569282	0.638676	1.08142
0.44588	0.628	0.583098
0.5495	0.567084	0.717804
0.5338	0.575562	0.378684
0.538196	0.793792	0.337236
0.59817	0.82111	1.04185
0.29516	1.07953	0.519984
0.45687	0.467232	0.572736
1.08989	0.606334	0.5652
0.492666	0.79913	0.540394
0.556722	0.540708	0.665052
0.725968	0.215404	0.363612
0.433634	0.608532	0.471
0.628	0.74575	0.380254
0.97183	0.771812	0.2826
0.592204	0.41134	0.506168
1.02992	0.360158	1.38694
0.82268	0.449962	0.942
1.07294	0.649038	0.418562
0.506796	0.812632	0.27632
0.891446	0.942	0.400664
0.574306	0.794106	0.20253
0.636792	0.2355	0.586238
0.860988	0.628	0.451846
0.495806	0.628	0.968062
0.328444	0.669762	0.628
0.603508	0.368008	0.960526
0.740412	0.669762	0.968062
0.665052	0.336294	0.65312
0.39878	0.724712	0.665052
0.8478	0.444938	0.732562
0.608218	0.459696	1.04656
0.709954	0.257794	0.5966
0.455928	0.530032	0.512448
0.420132	0.996008	1.4802
0.276006	0.71906	0.544162
1.0048	0.917822	0.709954
1.08393	0.892388	0.5495
1.10779	0.388418	0.695824
0.695196	0.874804	0.415736
0.883282	0.499574	0.40506
0.43018	0.552954	0.55264
0.567084	0.8792	0.531288
0.50711	0.628	0.375544
0.834612	0.899296	0.747948
0.580586	0.628	0.80384
0.677926	0.325618	1.00166
0.589692	0.269098	0.676984
0.471	0.2512	0.740098
0.77087	0.575562	0.55421
0.80541	0.52752	0.386534
1.30436	0.61544	0.599426
0.915938	0.680438	0.215404
0.968062	0.347598	0.260934
0.81326	0.900238	1.1888
0.395326	0.812632	0.807294
0.471	0.628	0.703674
0.794734	0.628	0.442112
0.742296	0.486072	0.291706
0.7065	0.695196	0.837438
0.297986	0.409142	0.346342
0.761136	0.39721	0.986902
0.660342	1.099	1.22743
0.59817	1.36056	0.478536
0.858162	0.48984	0.461894
0.401606	0.812632	0.51496
0.775266	0.523438	1.18221
0.831158	0.35325	0.19625
0.413224	0.552326	0.59189
0.602252	0.553896	0.481362
0.338492	0.90275	0.27632
0.35482	0.923474	0.655946
0.479164	0.889562	0.488584
0.8635	0.369264	0.418562
0.18369	0.659086	0.7222
0.55421	0.757368	0.314
0.494864	0.403804	0.628
0.303324	0.8478	0.272238
0.785	0.842148	0.884852
0.628	0.52752	0.523438
0.72848	1.0048	0.446508
0.465976	1.11313	0.356704
0.330956	0.90903	0.699278
0.384964	0.942	0.362356
0.558292	0.5495	0.84152
0.405688	0.471	1.0048
0.628	0.111156	0.55421
0.695196	0.6437	1.27578
0.382138	0.8164	0.867268
0.471	0.389674	0.513704
0.306464	0.460638	0.762706
0.243664	0.244292	0.411968
0.703674	0.436774	0.48513
0.715292	0.542278	0.74418
0.8635	0.422644	0.899296
0.578074	0.330642	0.652178
0.58718	0.338492	0.471
1.0946	0.332526	0.340062
0.820482	0.308662	0.13816
0.840578	0.79285	0.2826
0.932894	0.7065	0.21352
0.43175	0.221998	0.27004
0.425156	0.381196	0.247432
1.04876	0.60445	0.329072
0.729736	0.403804	0.203786
0.391244	0.338178	0.263446
0.593146	0.295788	0.325932
0.444938	0.219486
0.867268	0.516844
0.420446	0.327502
0.578702	0.471
0.92944	0.870094
0.479164	0.762706
0.991612	0.467546
0.807294	0.996636
1.03494	0.7065
0.80384	0.872292
0.949222	0.785
0.420446	0.872292
0.750146	0.53694
0.773696	1.02333
0.669448	1.03306
0.688916	0.774952
0.711838	0.643072
0.837438	0.617324
0.88391	0.850312
0.769614	0.65783
0.406316	0.422644
0.64213	0.552326
0.61858	0.42076
0.504912	0.870722
0.534428	0.284798
1.0676	0.407258
1.1304	0.789082
1.20356	0.58875
1.2268	0.767416
0.97183	0.269098
0.724712	0.37837
0.970574	0.414166
0.466918	0.12246
0.652178	0.314
1.1888	0.569282
1.26573	0.7379
0.435518	0.923474
0.160768	0.4553
0.428296	0.371148
0.917822	0.610102
0.485758	0.606962
0.785	0.271296
0.448706	0.86821
0.994438	0.444938
0.267528	0.723456
0.575562	0.366438
0.802584	0.77715
0.24492	0.812004
0.29359	0.65783
0.405688	0.84466
0.385592	1.15144
1.0676	0.44431
0.617324	0.901808
0.628	0.423586
0.55107	0.817656
0.403804	0.462522
0.701162	0.85408
0.519984	0.35168
0.38465	0.951106
0.513704	0.605078
0.97183	0.766474
0.740098	0.728166
1.1932	1.1282
0.481362	0.904948
1.20356	0.22765
1.07482	0.29202
0.97811	0.531288
0.942	0.985646
0.23079	0.6908
0.684206	0.5809
0.8164	0.399094
0.341946	0.67039
0.713722	0.330956
0.355448	0.129054
0.553582	0.338492
0.3768	0.202844
0.66725	0.489212
0.354192	0.258736
0.889562	0.124658
0.519984	0.414794
0.371148	0.368008
0.400036	0.3611
0.223254	1.0048
0.314	0.8635
0.314	0.523438
0.421702	0.8164
0.059346	0.320908
0.150092	0.25905
0.185574	0.794106
0.181806	1.12443
0.5495	0.785
0.333782	0.942
0.468488	0.994438
0.380882	0.742296
0.212578	0.822994
0.628	0.840578
0.844974	1.04656
0.556722	0.643072
0.8164	0.867268
0.837438	0.8635
1.05849	0.644642
0.95613	0.292962
0.85879	0.755798
0.375858	0.907146
0.444938	0.286368
0.802584	0.261562
0.66725	0.616696
0.717804	1.12318
0.496434	0.398152
0.637106	0.305836
0.474768	0.331898
0.942	0.446822
1.11093	0.412282
0.858162	0.893016
0.864128	0.450904
0.70807	0.10833
1.19603	0.348226
0.608218	0.645584
0.699278	0.378998
0.755484	0.702732
0.628	0.538196
0.990984	0.635536
0.795048	0.942
0.79599	0.257166
0.42704	0.459068
0.60288	0.98125
0.304894	0.546988
1.16368	0.5652
0.674472	0.381196
0.790966	0.576818
0.449962	0.794106
0.530974
0.467232
1.15144
0.852196
0.40506
0.745122
0.4082
0.78971
0.459382
0.840264
0.688288
0.325304
0.564258
0.54636
0.441798
0.727538
0.465662
0.5809
0.445252
0.662854
0.582156
0.50083
0.482932
0.488584
0.364868
0.154488
0.701476
0.933836
0.330014
0.374288
0.7065
0.490468
0.21509
0.62015
0.425784
0.807294
0.638676
0.561432
0.97183
0.60602
0.7065
0.920334
0.779976
0.331898
0.762706
0.443996
0.2355
0.639932
0.887992
0.790024
0.482618
0.453416
0.342574
0.942
0.422644
0.6751
0.355762
0.822052
0.628
0.703988
0.347598
0.371148
0.57776
0.692684
1.22743
0.889562
0.688288
0.90118
0.628
0.859418
0.860674
0.480106
0.462208
0.335352
0.45059
0.281658
0.9734
0.090746
0.87292

## Sheet: Figure 3G
Figure 3G Velocity (μm/s)
Dynein/Dynactin/Kash5-ΔTM	Dynein/Dynactin	Dynein/Dynactin/Kash5-ΔTM/Lis1	Dynein/Dynactin/Lis1
0.04867	0.70179	0.303533	0.238117
0.75988	0.596077	0.88862	0.56677
0.319757	0.145487	1.07964	0.872397
0.336503	0.320803	0.154383	0.121413
0.15857	0.658353	0.385173	0.098387
0.669867	0.24492	0.27789	0.900133
0.41291	0.680333	0.842043	0.32813
0.158047	0.11618	0.099433	0.242303
0.165373	0.217707	0.541127	1.09534
0.10048	0.407153	0.623813	0.33912
0.713827	0.044483	0.428087	0.10676
0.261667	0.540603	0.89176	0.872397
0.697603	0.506587	0.867163	0.165373
0.625907	0.04239	0.126123	0.250677
0.61701	0.465243	0.719583	0.371043
0.581947	0.261667	0.915833	0.029307
0.850417	0.091583	0.163803	0.462627
0.69237	0.10048	0.555257	0.44588
0.57462	0.062277	0.659923	0.80855
0.830007	0.32499	0.644223	0.162233
0.73947	1.00794	0.848847	0.15857
0.92002	0.428087	0.686613	0.594507
0.08164	0.101527	0.67824	0.371567
0.027737	0.079023	0.132927	0.593983
0.0942	0.448497	0.11932	1.0922
0.635327	0.697603	1.04667	0.485653
0.97183	0.558397	0.850417	0.705453
0.28103	0.071697	0.896993	0.485653
0.747843	0.969737	0.546883	0.43018
0.490887	0.876583	0.135543	0.410293
0.088443	0.187353	0.6123	0.471
0.498213	0.10362	0.25748	0.124553
0.135543	0.755693	0.154383	0.368427
0.702837	0.673007	0.81326	0.38936
0.378893	0.036633	0.302487	0.17584
0.155953	0.677193	1.12831	0.35168
0.156477	0.083733	0.19625	1.57
0.669867	0.2355	0.955607	0.53851
0.42704	0.612823	0.900657	0.47885
0.418667	0.77244	0.694463	0.300393
0.337027	0.151767	0.366333	0.174793
0.641083	0.314	0.365287	0.16956
0.02512	0.638467	0.710163	0.108853
0.74261	0.63428	0.53066	0.2826
0.956653	0.746273	0.196773	0.632187
0.677717	1.16285	0.483037	0.16956
0.491933	0.851987	0.56206	0.283123
0.101527	0.053903	0.72377	0.671437
0.044483	0.22608	0.49769	0.732667
0.735807	0.203577	0.44274	0.10362
0.162233	0.26533	0.816923	0.165897
0.840997	0.050763	0.319757	0.360053
0.115657		0.542697	0.487223
0.072743	0.335457	0.673007	1.1775
0.641607	0.10048	0.837333	0.166943
0.268993	0.432273	0.70807	0.187353
0.383603	0.10362	0.546883	0.04867
0.1099	0.162233	0.305103	0.925777
0.413433	0.190493	0.39407	0.78186
0.722723	0.572003	0.38622	0.739993
0.05809	0.66097	0.385173	1.6103
0.15072	0.677193	0.785
0.049717	0.101527	0.743657	0.999043
0.267423	0.068557	0.51025	0.570957
0.124553	0.42076	0.068033	0.410293
0.115133	0.31714	0.349063	0.134497
0.284693	0.638467	0.812213	0.850417
0.137113	0.581423	0.21195	1.29787
0.158047	0.093677	0.539557	1.11313
0.063847	0.101527	0.575667	0.255387
0.063323	0.61073	0.065417	0.206717
0.376277	0.10205	0.837333	0.619627
0.399303	0.046053	0.697603	0.457393
0.531707	0.48199	1.21466	0.281553
0.57148	0.285217	1.11784	0.895947
0.585087	0.556303	0.67667	0.352727
0.077453	0.419713	0.590843	0.075883
0.106237	0.150197	0.1099	0.789187
0.769823	0.428087	0.308767	0.751507
0.034017	0.08635	0.13659	0.08792
0.741563	0.21195	0.45059	0.074837
0.73162	0.22765	0.67667	0.20096
0.070127	0.110947	0.59503	0.071173
0.102573	1.20053	0.43018	0.298823
0.109377	0.817447	0.286263	0.10676
0.114087	0.160663	0.155953	0.70807
0.0471	0.344877	0.87763	0.887573
0.02355	0.024597	0.775057	0.10833
0.678763	0.052857	0.572527	0.08007
0.70964	0.189447	0.183167	0.203577
0.12089	0.055473	0.834717	0.24335
0.583517	0.06594	0.321327	0.318187
0.09106	0.117227	0.781337	0.12246
0.38936	0.22608	0.61073	0.07379
0.267947	0.030877	0.198867	0.209857
0.498213	0.219277	0.502923	0.864023
0.069603	0.352727	0.896993	0.924207
0.214043	0.294637	0.920543	0.889667
0.109377	0.05966	0.79285	0.030877
0.090537	0.08792	0.84309	0.363193
0.1099	0.275273	0.872397	0.915833
0.295683	0.068557	0.559967	0.920543
0.496643	1.256	0.47885	0.583517
0.438553	0.266377	0.48042	0.396163
0.378893	0.037157	0.721677	0.080593
0.57462	0.484083	1.04667	0.62015
0.092107	1.11575	0.983867	0.138683
0.079547	0.569387	0.254863	0.097863
0.23393	0.09263	0.833147	0.222417
0.679287	0.878677	0.736853	0.362147
0.11932	0.060707	0.181597	0.704407
0.27475	0.27161	0.714873	0.483037
0.139207	0.27004	0.956653	0.402967
0.132927	0.245443	0.5652	0.75831
0.59817	0.278413	0.77244	0.63899
0.60759	0.294637	0.331793	0.48199
0.4082	1.07597	0.95142	0.839427
0.531183	0.2355	0.755693	0.13188
0.567817	0.12717	0.48199	0.24806
0.406107	0.272657	0.49141	0.664633
0.32499	0.218753	0.636373	0.6123
0.044483	0.757787	0.636897	0.196773
0.289927	0.630093	0.195203	0.402443
0.13816	0.115133	0.46786	0.801223
0.751507	0.688183	0.842567	0.568863
0.09734	0.631663	0.769823	0.276843
0.268993	0.497167	0.791803	0.697603
0.058613	0.146533	0.785	0.297777
0.711733	0.38622	0.4082	0.125077
0.166943	0.18055	0.637943	0.097863
0.08792	0.297777	0.628	0.363717
0.053903	0.157	0.418667	0.697603
0.209333	0.07536	0.637943	0.86978
0.08164	0.13502	0.958747	0.64213
0.4396	0.674577	0.417097	0.247013
0.333887	0.21666	0.354297	0.75203
0.10362	0.27475	0.383603	1.02469
0.56363	0.108853	0.512867	0.95927
0.06594	0.093153	0.452683	0.562583
0.113563	0.130833	0.457393	0.915833
0.094723	0.123507	0.953513	0.13973
0.428087	0.17427	0.772963	0.53066
0.593983	0.98125	0.57462	0.785
0.596077	0.125077	0.890713	0.145487
0.855127	0.59503	0.11304	0.17427
0.685567	0.666727	0.729003	0.25905
0.875013	0.076407	0.70179
0.10676	0.761973	0.935197
0.327607	0.066463	0.37994
0.236023	0.115133	0.663587
0.298823	0.105713	0.506063
0.50711	0.325513	0.580377
0.204623	0.049717	0.125077
0.113563	0.17898	0.89176
0.074837	0.903797	0.349063
0.72377	0.22294	0.719583
0.531183	0.699697	1.01579
1.07022	0.071697	0.670913
1.155	0.05652	0.76773
0.95299	0.220847	1.0273
0.136067	0.135543	0.147057
0.30772	0.196773	0.616487
0.10833	0.75203	0.816923
1.11418	0.869257	0.451113
1.28845	0.25748	0.95456
0.08635	0.04867	0.76302
0.471	0.051287	0.396163
0.3611	0.503447	0.242827
0.34226	0.95142	0.1884
0.040297	0.305103	0.5809
0.127693	0.07536	0.245443
0.05809	0.999043	0.493503
0.45373	0.228173	0.575667
0.121413	0.07222	0.401397
0.157		0.305103
0.418667		0.686613
0.111993		0.074313
0.245443		0.121937
0.097863		0.411863
0.153337		0.152813
0.13816		0.836287
0.164327		0.165897
0.128217		0.798607
0.771393		0.351157
1.0901		0.580377
0.103097		0.46158
0.102573		0.479897
0.2041		0.171653
0.038727		0.812737
0.115133		0.787617
0.02669		0.30772
0.11618		1.256
0.142347		1.30833
0.435937		0.702837
0.89961		0.72534
0.406107		0.267947
0.284693		0.713303
0.285217		0.837333
0.05966		0.360577
0.674577		0.572527
0.358483		0.655737
0.122983		0.303533
0.942		0.17113
0.17584		0.305627
0.219277		0.17584
0.113563		0.94985
0.179503		0.735807
0.145487		0.474663
0.146533		0.465243
0.165373		0.537463
0.831053		0.647887
0.53851		0.917927
1.19215		0.124553
0.137637		0.29516
0.06751		1.11941
0.07693		0.398257
0.19625		0.95456
0.523333		0.600263
0.103097		0.116703
0.10676		0.319757
0.23393		0.872397
0.264807		0.483037
0.09263		0.271087
0.893853		0.43489
0.732667		0.501353
0.925777		0.427563
0.270563		0.18369
0.601833		0.283123
0.06123		1.04667
0.6437		0.5024
0.625907		0.304057
0.45373		0.245443
0.735807		0.988577
0.590843		0.614393
0.697603		0.187877
0.988577		0.99538
0.118273		0.555257
0.087397		0.15072
0.137637		0.42233
0.950373		0.988577
0.648933		0.14444
0.847277		0.21823
0.71278		0.34226
0.977063		0.134497
0.750983		1.53284
0.119843		0.762497
0.08321		0.607067
0.070127		0.761973
0.286263		0.54322
0.11461		0.215613
1.30833		0.845183
0.994333		0.13816
0.510773		0.068557
1.4826		0.110423
0.22451		1.01579
0.161187		0.55578
1.46533		0.103097
0.140253		0.729003
0.119843		0.676147
1.256		1.00114
1.76625		0.561537
0.418667		0.316617
0.592937		0.796513
0.530137		0.926823
0.515483		1.27118
1.07911		1.30833
1.01579		0.732667
0.817447		0.523333
0.889667		0.724293
1.34549		0.263237
0.122983		0.969213
0.231837		0.718013
0.878677		0.86193
0.96084		0.12717
0.08164		0.654167
0.647363		0.579853
0.13816		0.387267
0.03925		0.223463
0.088443		0.14287
0.545837		0.819017
0.464197		0.1256
0.135543		0.15857
0.76616		0.077977
0.468383		0.22137
0.494027		0.677193
0.261667		0.07222
0.148103		0.668297
0.074313		0.383603
0.06123		0.11618
0.103097		0.08478
0.755693		0.800177
1.06132		0.816923
0.966073		0.37052
0.818493		0.68452
0.544267		0.613347
0.96398		0.193633
0.581423		0.804887
0.647887		0.440647
0.500307		0.395117
0.523333		0.402443
0.78029		0.48042
0.117227		0.671437
0.117227		0.404537
0.60916		0.422853
0.399827		0.563107
0.771393		0.264283
0.096293		0.400873
0.490363		0.19625
0.903797		0.64998
0.18683		0.729003
0.1727		0.494027
1.13877		0.64841
0.994333		0.650503
0.349063		0.582993
0.055473		0.287833
0.686613		0.59974
0.797037		0.608637
0.415003		0.77715
0.107807		0.713303
0.27475		0.710163
0.123507		0.385173
0.61073		0.618057
0.258003		0.749413
0.141823		0.75831
0.17741		0.856173
0.148103		0.298823
0.07693		0.091583
0.75203		0.675623
0.13345		0.38936
0.504493		0.39564
0.568863		0.785
0.22451		1.07283
0.184213		0.498213
0.233407		0.660447
0.18683		0.21823
1.20157		1.25024
0.116703		0.446403
0.442217		0.95456
0.501877		1.04667
0.812213		0.459487
0.093677		0.76145
0.362147		0.292543
0.188923		0.625383
0.292543		0.619627
0.07693		0.69237
1.099		0.487747
0.6123		0.570957
0.18055		0.088967
0.581423		0.210903
0.398257		0.710163
0.17113		1.29944
0.278413		0.47728
0.0628		0.154383
0.66254		0.926823
0.594507		0.761973
0.483037		0.892283
0.064893		0.937813
0.225033		0.050763
0.15072		0.314
0.47571		0.498213
0.379417		0.991193
0.068033		0.977587
0.551593		0.828437
0.7536		0.808027
0.06594		0.746273
0.079023		0.628
0.24178		1.02312
0.74889		0.079547
1.0676		0.104667
0.483037		0.755693
0.495597		0.749413
0.10205		0.815353
0.1256		0.61701
0.477803		0.72377
0.37366		0.585087
0.245967		0.804887
0.363717		0.407153
0.079547		0.61858
0.32028		0.187877
0.099957		0.75988
0.047623		0.719583
0.471		0.48042
0.05024		0.202007
0.989623		0.638467
0.273703		0.779243
0.323943		0.743657
0.687137		0.316617
0.12089		0.64213
0.16642		0.40506
0.460533		0.772963
0.84309		0.172177
0.523333		0.545837
0.130833		1.20105
0.711733		0.677193
0.11932		0.716443
0.199913		0.573573
0.41134		0.651027
0.090537		0.141823
		0.612823
		0.457393
		0.641083
		0.856173
		0.239163
		0.619627
		0.84937
		0.578807
		0.654167
		0.292543
		0.183167
		0.523333
		0.41291
		0.249107
		0.113563
		0.514437

## Sheet: Figure 3H
	Figure 3H Processive events (events μm-1 nM-1)
	Dynein/Dynactin/Kash5-ΔTM	Dynein/Dynactin	Dynein/Dynactin/Kash5-ΔTM/Lis1	Dynein/Dynactin/Lis1
	0.549522	0.035471	3.54587	0.110344
	0.407592	0.046777	3.26638	0.137624
	0.512115	0.037688	1.08119	0.140554
	0.469019	0.037274	1.68913	0.133452
	0.584146	0.062459	2.14098	0.198338
	0.592503	0.072261	3.6172	0.162796
