# Supplementary material for: The KASH5 protein involved in meiotic chromosomal movements is a novel dynein activating adaptor
Source: eLife. 2022 Jun 15;11:e78201. doi: 10.7554/eLife.78201 (PMC9242646; doi:10.7554/eLife.78201)
Supplement: Figure 4—figure supplement 1—source data 1. [file elife-78201-fig4-figsupp1-data1.xlsx]

## Sheet: Figure 4-supp 1A
Figure 4SA Landing Rate (events μm-1 min-1)
WT	I36	T40	Y60	V64	R73	L77	F97	L98	M101
0.276043	0.29101	0.308854	0.0921621	0.221238	0.182996	0.00439029	0.0096387	0.140502	0.00939066
0.256991	0.23099	0.22748	0.131721	0.107373	0.140015	0.00721544	0.00620802	0.0554265	0.00328152
0.203172	0.286822	0.488441	0.103022	0.235235	0.104216	0.0163428	0.0109912	0.312227	0.00549467
0.171177	0.193013	0.200775	0.0773474	0.20655	0.0822525	0.0108926	0.0119361	0.228712	0.00405955

## Sheet: Figure 4- supp1B
	Figure 4SB Run Lengths ( μm )
	WT	I36	T40	Y60	V64	R73	L77	F97	L98	M101
	6.751	4.553	12.617	4.68551	7.05888	5.55827	3.08568	11.475	2.09375	2.73274
	9.28357	4.85208	5.33517	2.66712	6.62666	3.24833	4.52788	4.40228	5.7035	2.01353
	3.67035	6.15566	3.60488	2.66712	3.31333	1.949	3.09039	2.59301	5.92016	8.33858
	8.99579	3.7658	13.4821	0.937133	4.6819	2.7431	2.30099	2.44889	2.74342	7.39407
	2.80669	2.24494	8.21895	2.37886	19.4477	4.83638	2.01902	4.74376	6.93092	3.51758
	3.67035	3.62089	7.28182	2.51655	13.5414	1.80472	5.03421	3.63204	6.71426	2.29722
	4.1021	4.41751	7.9307	4.68551	2.95317	6.6411	2.58736	2.01886	3.97084	2.65613
	7.19657	3.7658	4.90264	2.66712	2.44904	4.54766	4.71	4.03757	2.4547	3.23216
	12.5941	7.16941	9.44465	2.66712	3.74555	3.53705	4.32111	2.59568	1.22743	2.22657
	4.74972	2.17257	1.65823	0.937133	4.32174	1.949	4.32252	3.59467	1.66059	2.15671
	5.03766	4.77971	13.41	2.37886	1.65666	5.91921	4.32912	2.66005	1.44393	4.95413
	3.45431	5.57633	9.15624	2.51655	2.80904	4.61988	3.1031	1.29745	3.17674	2.44119
	8.85182	4.99684	2.16283	3.10044	16.2355	6.13587	1.94853	0.79285	1.37171	4.76087
	9.4996	13.832	2.88393	3.1725	1.80393	2.81532	5.26405	3.925	3.2488	4.31263
	19.9346	6.08312	7.49801	0.793164	4.47387	2.38216	4.11026	1.15128	1.51615	5.67822
	8.42007	2.82427	4.61423	2.46804	1.87615	2.1655	2.44904	1.65509	1.58837	3.16261
	3.81416	9.92146	1.44189	4.42803	2.02043	1.66027	3.31333	6.76246	2.31026
	4.174	4.70717	6.27246	3.0312	1.94821	2.45438	1.72873	2.88425	1.66059
	3.09447	6.06193	5.55136	3.46436	3.5358	2.52644	2.38043	2.74059	1.80487
	10.4352	4.90719	1.65823	1.44346	4.04087	2.02122	1.94758	7.7748	1.80487
	10.3631	4.1134	1.36983	1.29917	1.80393	5.99143	3.31819	2.6646	5.40692
	5.82925	4.04118	2.66759	3.18223	3.24707	1.73249	1.44267	8.22193	1.94649
	5.32544	7.14428	1.58617	3.91291	1.94821	3.24833	2.52252	8.22193	1.36967
	9.85944	3.31961	2.81171	3.0312	1.73187	4.4756	2.88299	2.37541	2.52315
	3.74225	3.46389	3.749	3.46436	2.66979	2.67088	2.66664	1.72763	1.94649
	5.32544	3.96912	2.37918	1.44346	3.5358	1.58805	3.2455	2.51938	1.51395
	3.3105	8.37108	2.37918	1.29917	3.89658	1.37155	0.937604	4.47105	3.19573
	6.83672	3.24739	1.65823	6.437	1.51536	1.87678	5.34664	1.94711	2.1553
	5.54147	6.71128	1.87458	1.8011	5.12322	2.23772	1.66185	16.2869	1.3378
	2.73478	6.71128	5.19089	1.15269	6.69212	0.721886	1.73406	2.16158	1.56074
	7.70038	2.81438	3.96535	1.58507	6.33228	3.39277	5.62107	6.20778	5.20235
	2.95066	2.52582	0.648881	0.576347	5.97259	2.30994	2.01776	5.48605	3.04706
	4.82178	3.82468	0.576818	2.44951	4.96512	4.25894	2.38436	1.44362	4.97941
	3.74225	2.16487	1.29776	1.8011	3.81384	1.949	5.024	2.16189	3.49294
	3.3105	2.59788	5.11883	1.36888	3.66988	3.39277		2.08983	2.22956
	3.88622	4.40212	2.73965	1.44095	4.74925	1.51584		5.04284	4.75631
	14.5371	1.80409	1.95308	1.29682	4.74925	3.03183		3.09777	4.23617
	3.88622	2.16487	2.956	1.65698	6.18847	5.12401		1.94602	2.22956
	3.02256	1.73202	5.26311	3.89988	3.59797	2.95898		2.23427	3.96833
	4.53385	23.0206	1.00935	1.22774	2.30272	3.89721			4.83403
	5.18163	1.08251	1.08142	1.15552	7.33975	5.12401			7.28716
	3.09447	3.8969	5.32591	1.36888	13.6475	5.12401			2.23662
	5.75735	1.01029	5.18194	1.94523	19.8575	2.09297			2.95819
	5.90116	1.4433	2.23113	1.8011	4.76574	2.52597			2.23662
	1.79922	1.2268	4.894	1.87317	5.12683	1.87646			4.0404
	2.73478	4.40212	4.10241	4.46665	6.35442	2.09297			1.65949
	3.95153	1.51552	4.17432	1.58492	0.866483	3.68071			1.51521
	2.44276	1.4433	2.447	2.09124	2.23851	1.73202			2.23662
	3.80788	2.23709	5.03797	2.01902	4.69351	3.53627			3.82232
	5.81968	1.2268	1.51144	1.15379	2.23851	2.52597			3.67804
	5.46046	1.73202	2.59097	1.37014	6.06554	1.80424			6.27419
	5.02934	1.37108	2.3751	2.45909	4.33257	2.23725			4.32708
	4.16709	1.58758	3.52653	2.38671	4.69351	7.57776			2.45203
	9.77121	1.15458	3.16669	1.44644	2.67167	1.01029			2.67057
	4.1605	2.16487	6.98132	2.24212	1.80519	3.03104			3.75324
	3.73613	0.938075	6.0456	3.61634	2.09407	10.7388			2.09312
	1.65243	7.72346	3.95844	10.2954	7.12152	10.0901			2.09312
	4.81378	5.26923	3.74257	2.66382	7.04961	3.45949			1.5879
	1.93989	3.5369	1.72731	1.94397	3.81259	3.02712			2.0209
	4.74187	6.49635	3.09478	7.05558	4.10021	2.37839			2.0209
	4.02344	7.21807	2.73494	2.66382	3.02131	2.59458			2.52629
	4.09535	6.1354	6.18957	1.00794	6.18643	4.18028			1.37139
	4.16709	4.98051	2.23113	2.15985	1.72637	1.36935			1.37139
	5.53221	5.63018	1.00763	1.79985	7.04961	1.94602			2.95427
	1.50877	4.47529	3.60582	2.87985	3.38099	1.00904			0.792693
	2.29911	3.60912	3.24535	2.08794	2.01415	2.23427			2.67057
	0.862244	3.03167	3.60582	1.79985	2.37384	2.09014			3.75324
	2.08355	4.76401	3.7501	0.863971	1.36668	2.23427			2.09312
	3.37676	5.77446	2.37996	1.79985	2.80543	0.864913			4.33069
	2.51467	4.11434	1.58664	2.37588	2.37384	2.45046			2.09312
	3.01754	2.1655	2.81265	5.96569	3.97084	7.72314			1.5879
	2.80198	2.09328	3.31741	2.87498	3.46546	8.7336			2.0209
	2.58657	5.98296	1.58664	2.37196	2.38247	7.72314			2.0209
	7.61576	1.65792	5.26468	12.4344	4.62067	7.93965			2.52629
	3.44866	2.30664	1.3703	5.4625	1.58837	16.4567			1.37139
	1.22146	4.75741	7.64449	1.29384	2.88786	7.1457			1.37139
	1.14955	1.65792	2.74044	2.58752	5.05383	2.45407			5.41776
	0.718432	1.51379	1.22601	3.0188	2.67136	2.16534			4.55096
	1.93989	2.01839	2.30774	1.43749	3.0323	4.54719			2.45611
	1.14955	1.51379	1.22601	0.790652	2.38247	8.30059			2.38389
	1.58068	1.87411	1.44236	1.5094	3.97084	2.09312			1.73375
	9.05168	1.22538	1.29808	0.862558	2.81564	2.95929			2.16707
	8.54881	1.94617	2.59631	1.79686	2.52691	6.35175			1.66153
	0.862087	2.66712	5.84024	2.51561	4.53149	2.23756			1.22805
	6.10636	1.29745	3.38869	8.9826	1.5824	2.16534			2.66994
	5.45967	2.59505	17.1601	4.31169	6.11405	2.23756			1.94837
	7.3275	0.86507	4.25392	1.72464	4.81927	1.51568			3.82452
	2.3707	6.77581	3.89344	6.82683	4.38768	2.30978			2.09265
	3.73566	2.73918	2.16299	1.07796	4.67546	1.87395			3.89674
	2.08339	3.24378	2.88409	6.10808	7.04914	2.30633			2.81422
	14.7269	2.30664	2.88409	2.51514	5.32277	3.31537			2.02059
	4.52584	3.3879	2.01886	1.50908	3.59656	2.73871			2.95882
	16.3792	2.01839	5.84024	2.7307	6.47358	3.02712			3.60817
	4.45393	2.23458	3.10044	7.25795	4.67546	3.53642			3.03089
	4.23853	7.56866	2.37934	3.66485	3.10672	1.87646			3.8969
	5.24427	11.245	2.09093	2.22767	3.17894	2.02075			7.14366
	5.02871	2.09045	5.91231	0.287467	2.09517	3.31992			2.23694
	6.32176	3.24378	4.3982	4.02422	1.80613	3.46421			2.5255
	5.74714	2.45077	4.97502	0.646683	2.60086	2.95898			2.45344
	3.08913	2.37871	1.29776	0.790495	2.3842	2.59819			1.65965
	3.44819	1.36951	2.37934	1.14971	1.15599	1.94868			1.87615
	3.5201	5.40206	2.09093	2.51514	2.73792	2.30947			3.46358
	3.5201	5.69015	3.39544	2.01211	5.83616	1.65996			3.17501
	2.08339	7.70682	1.73391	4.59884	6.48457	8.29965			3.17501
	2.87357	5.69015	2.31182	4.31138	3.02617	1.65996			2.88095
	1.43671	2.73698	3.251	3.73644	1.94539	2.59819			3.8892
	3.37644	3.96142	2.02279	3.73644	8.35789	1.58774			2.66492
	2.3707	10.9481	3.90129	3.30532	3.67458	1.80424			2.2327
	1.65227	4.46571	2.23961	2.08386	1.29698	1.94633			3.09698
	2.15514	2.88111	3.17878	6.6119	4.75537	2.66712			2.73682
	2.3707	3.02508	2.81752	7.61811	1.94539	2.01839			2.59286
	2.72992	4.96983	2.7453	2.80292	4.0349	1.65792			2.95301
	3.5201	2.52095	2.31182	2.01227	4.32299	1.72998			1.72857
	2.44245	4.39365	1.37265	3.66532	1.65714	3.31961			2.80889
	8.33325	2.88111	3.68448	0.862401	1.51301	7.43316			4.1773
	3.02037	3.09714	2.45627	2.58736	2.66586	1.58774			3.31301
	3.81133	3.52936	3.97351	3.23404	1.00873	4.18562			4.1773
	3.02037	5.32999	2.31182	1.50924	1.73406	6.71159			2.01667
	3.81133	3.38523	2.16738	1.07796	2.6734	2.23725			2.44873
	2.66084	5.32999	2.81752	2.37164	2.52896	2.95882			1.22444
	6.25645	7.85094	1.80613	5.38997	3.90176	1.58774			4.98177
	5.60914	5.76221	3.61226	4.74313	3.6851	2.02075			8.66389
	6.32836	1.72857	2.16738	2.15592	3.10703	3.16936			6.28126
	2.94846	1.65666	5.40567	1.58099	3.17925	2.37698			5.84809
	22.2929	4.24952	10.1626	2.29974	4.76888	1.44063			2.88802
	5.1777	2.52095	9.15341	3.52261	4.96512	2.8092			6.71458
	4.74627	3.38523	5.62186	5.60741	3.09416	1.58476			5.34271
	2.51687	3.60142	3.31537	1.65352	3.74178	4.98444			3.6099
	1.51018	4.89777	14.415	9.05812	9.93025	2.31167			3.46562
	4.96199	4.89777	5.04519	3.30689	1.87097	12.7142			3.53768
	3.02037	2.01682	8.93722	2.80371	2.37462	2.38389			3.53768
	2.58893	2.23285	6.63089	2.58799	3.61226	2.09501			3.32118
	2.37305	4.89777	5.83805	1.50971	3.61226	2.09501			3.53768
	2.58893	3.74539	4.46869	2.7318	2.23961	2.96181			3.0323
	1.07875	4.46571	3.09918	2.15671	5.85186	1.30027			3.10452
	1.51018	3.31317	4.82901	4.38532	2.23961	1.73375			3.68212
	1.7259	3.09714	3.09918	3.4507	3.54004	2.02263			2.8158
	3.23608	1.80063	2.45061	1.07828	5.9963	1.08361			6.35348
	2.66084	2.66507	4.32441	6.04073	2.7453	3.82876			2.38263
	2.22924	1.22444	3.02712	12.8005	4.46084	2.09061			3.6099
	1.79781	4.32158	2.09014	2.73274	6.25959	0.504598			2.52691
	2.66084	1.51254	2.73887	4.81817	2.87797	1.44189			4.32472
	1.00684	8.4119	6.05423	2.22924	3.30972	1.08142			4.39679
	5.60914	6.25504	2.30633	1.36637	3.5975	1.87442			9.22611
	1.29446	6.9741	1.29729	2.22924	2.51828	0.720944			9.87467
	1.15065	3.16355	1.29085	1.58209	1.94256	2.37902			7.85659
	7.79411	6.39885	1.87395	3.9553	3.81337	3.10106			4.54091
	6.06208	6.9741	1.36935	4.17102	2.37431	2.52425			1.22538
	4.11356	4.74517	2.6668	2.80465	2.15844	7.06767			7.56818
	5.26829	4.31389	2.23427	5.6812	2.59019	4.25501			2.01823
	6.42287	1.50987	2.52268	6.04073	3.89595	10.0967			1.94617
	2.23725	3.38979	3.39151	4.24292	3.0301	1.87505			16.506
	2.23725	2.74059	4.7626	1.58209	1.44299	2.81265			5.91042
	3.17532	5.33706	3.60802	1.00684	2.02012	3.75026			2.37855
	4.25784	1.80299	2.30916	7.1884	4.1123	1.58664			8.15222
	3.10326	1.80299	3.03073	4.52867	1.9479	2.37996			12.7694
	4.11356	1.15395	2.59772	2.22846	4.1123	2.01933			4.90578
	2.81454	1.73093	4.7626	5.24757	1.37077	2.45203			7.71938
	3.24755	1.58664	7.86554	0.862558	1.87584	1.80299			8.58507
	4.11356	1.94727	1.44314	3.45039	3.60739	2.16362			4.18436
	5.98986	4.53055	4.7626	2.58783	2.88582	1.29808			8.36873
	3.24755	2.87655	1.73187	2.37211	5.97416	1.08173			3.0301
	2.23725	2.80465	1.08236	2.80339	4.24669	2.30774			6.70939
	3.17532	1.86971	1.73187	3.30673	1.65556	1.22601			2.8136
	5.55686	1.58209	1.37108	2.8753	3.67097	1.44236			2.45281
	3.17532	1.43828	3.17501	7.26031	5.75829	1.87505			2.59725
	2.67026	3.30799	0.931795	4.38485	0.93572	4.11073			1.00998
	3.75277	1.654	5.90446	2.30021	1.00763	2.66837			2.74153
	3.96927	3.09227	4.53636	3.5223	1.79953	2.0914			3.24645
	4.76307	5.41807	3.24032	3.23483	2.80716	4.3993			1.22648
	4.04134	3.03418	3.52826	4.02548	1.07969	1.00967			2.30853
	3.17532	4.26224	3.31223	3.87429	1.72747	2.23568			2.09218
	3.03104	5.34585	7.20065	4.08938	1.07969	2.0914			5.19435
	3.24755	1.80597	12.7451	1.36307	2.80716	2.74044			0.577132
	3.31976	3.17862	5.61652	1.93707	6.93124	2.88472			2.09218
	2.88676	2.38404	5.61652	2.36756	2.88802	1.3703			4.11214
	4.69085	2.45627	3.16826	0.860988	9.77168	2.30774			6.20433
	4.18578	1.51709	5.76049	6.25739	16.2861	4.89777			3.96786
	4.11356	2.09501	4.24842	3.16465	2.81297	2.88111			3.82358
	1.94853	1.80597	3.60032	2.08575	6.95855	1.5846			1.7314
	1.58774	20.8055	4.75239	3.09274	3.40533	1.65666			2.45281
	2.52582	6.0423	3.88826	2.58924	9.84563	1.5846			8.65729
	5.41885	5.39483	10.0808	2.22971	3.99753	1.72857			3.17438
	9.24808	10.7897	8.85668	4.09974	4.36758	3.8173			1.7314
	4.69634	5.68262	2.30413	4.1032	3.70143	3.60896			5.69941
	4.47952	3.23687	5.61652	3.59938	3.70143	3.9699			4.18436
	3.61257	3.09306	3.02429	4.03129	3.25728	3.17595			2.95788
	4.04605	5.75452	1.94413	1.29572	1.62856	4.25863			6.57123
	4.26286	2.37368	3.52826	1.79969	5.9963	5.3413			4.91033
	2.67324	2.22987	2.23537	2.08763	1.55461	1.51584			5.77697
	3.32353	3.30877	1.37014	1.79969	1.03636	1.51584			3.53831
	2.89006	5.17912	3.10075	5.11113	2.36882	2.67073			4.54939
	2.45658	4.96324	8.43687	5.68701	0.96241	1.29917			4.54939
	1.01155	1.87018	6.99466	7.34273	2.14682	2.23756			4.26051
	2.16754	2.30178	2.01902	1.43969	1.62856	2.52629			4.26051
	9.89838	2.51765	2.01902	3.454	1.48051	1.08267			2.67183
	9.68172	2.44559	1.94696	5.338	2.30162	1.22711			1.94978
	3.82939	2.15796	1.94696	2.983	2.00458	2.88723			1.58868
	5.12982	3.88434	2.1633	9.891	0.890975	3.88952			2.022
	1.80628	4.76055	0.504755	4.082	2.67293	3.4573			2.31073
	1.66185	2.81297	2.81234	4.239	1.85621	4.7538			1.73312
	4.62412	2.16393	2.8844	2.041	2.07884	2.44889			5.97809
	2.60102	2.45234	1.80283	2.669	1.18802	2.23285			2.59286
	3.25131	4.0393	2.30759	1.727	1.93047	4.03835			6.91444
	12.7074	3.75073	7.70713	1.256	2.07884	5.84119			4.60968
	2.23819	1.5868	4.6819	9.42	3.11833	14.1341			2.23285
	3.24912	2.66884	16.8547	4.082	1.63343	8.43718			1.72857
	6.28157	1.73108	2.44904	0.785	3.93505	6.92276			2.73698
	1.94947	4.18358	2.52095	1.0789	1.26212	18.9658			8.13888
	3.7545	3.3901	3.74555	1.79828	2.45548	4.83152			8.71507
	3.68228	2.16393	2.59301	1.5105	4.76652	5.91325			4.03349
	5.27065	2.23599	1.8727	4.89133	7.07615	5.04786			4.17746
	3.61006	1.44252	2.66507	2.22987	4.98224	6.56229			1.51254
	2.31041	1.15411	7.563	1.15097	3.53815	2.74028			2.44889
	2.82223	8.4119	3.45745	3.74649	3.53815	3.17297			1.94476
	2.16597	6.25504	1.72873	2.80983	6.85949	4.39883			1.94476
	2.67151	3.16355	2.44904	8.86186	3.53815	2.74028			2.44889
	1.15521	6.39885	2.08888	1.51301	2.67167	3.67773			3.88936
	1.58837	6.9741	1.15254	3.38618	14.0801	5.70538			3.74539
	4.9097	4.74517	1.36857	3.67443	2.96039	3.53878			3.8173
	7.7255	4.31389	2.01682	6.34029	3.24927	4.26098			5.41697
	1.29965	1.50987	1.51254	2.30554	4.40448	5.99426			6.71709
	2.31041	2.5164	3.52936	2.88456	6.7152	3.611			1.87788
	1.37187	6.76246	1.51254	6.99498	4.04354	4.3332			1.73344
	1.66059	4.60434	6.99514	4.61517	2.09391	2.59992			2.09454
	2.38263	3.66909	4.47105	5.26421	8.59245	3.9721			1.51678
	9.31136	4.02878	3.02884	2.88456	2.23835	4.11654			2.81689
	2.52629	2.87765	3.67788	1.73077	13.358	2.31104			3.25021
	9.02263	4.74815	4.11057	1.65918	5.92094	2.8888			2.23898
	3.24817	4.02878	1.80283	3.02963	1.66075	3.89988			3.46687
	2.30978	2.73384	3.96629	7.64637	1.73297	2.81658			3.10577
	4.76385	1.44252	2.01918	2.38043	3.46593	2.59992			5.99489
	2.95945	2.30806	2.95678	2.23615	4.54892	1.22774			6.21155
	1.5879	3.17344	1.58648	2.38043	4.98224	6.06208			1.73344
	1.73234	1.29823	1.65871	5.98719	3.32149	7.72189			1.5105
	4.1864	2.01949	1.00967	2.81328	3.53815	3.82483			5.27253
	2.30978	3.82468	1.15379	1.51489	2.81595	2.16503			2.81689
	1.44362	4.11324	1.65871	1.87552	2.74389	3.39183			3.17799
	1.29917	11.2574	5.33643	2.95757	3.97132	3.24755			2.45564
	0.938389	2.30916	10.3124	0.649195	2.45501	3.89705			3.39465
	1.94884	6.42256	1.15379	9.23207	3.17313	3.39183			5.05587
	1.94884	2.4536	2.95678	2.74075	8.0048	2.59804			2.59395
	1.01045	3.82468	4.18719	4.03898	5.76912	4.40212			2.16676
	1.80456	3.24739	5.63096	13.3433	3.02884	2.16503			3.32243
	1.15489	1.73187	3.53737	4.83246	9.01431	1.6598			2.02232
	12.3465	5.41226	8.22994	1.87521	4.2547	5.05776			2.3112
	3.833	3.89674	5.7754	1.87521	5.04802	7.15308			1.80173
	4.25988	4.32975	11.2619	3.82248	4.75961	3.32369			2.08998
	4.3321	4.76275	3.89831	6.13038	4.39898	3.54051			2.1622
	2.09391	8.01014	3.46515	4.6158	4.11057	5.99709			1.22523
	2.74373	4.18546	4.25925	3.38508	3.60582	3.25147			1.80173
	2.67151	3.39167	8.22994	8.93079	3.46154	4.26302			2.52252
	5.70397	3.03089	4.9813	4.75993	2.66822	1.95088			1.58554
	3.68228	2.38138	3.32086	4.24936	3.17313	4.0462			1.51348
	5.55953	3.31945	7.00267	3.24111	5.04802	7.36471			1.58554
	3.82672	2.88645	3.68181	4.75349	6.12975	5.48746			4.46838
	3.3934	1.95481	3.03198	1.08032	10.3124	4.40432			3.60802
	1.80503	2.6701	8.22994	1.51254	3.5336	2.59929			3.39151
	2.23819	2.88645	2.59898	1.87254	4.11057	4.6932			3.39151
	4.76526	5.34004	3.03198	1.15238	2.45187	4.26004			3.68024
	1.66059	2.95866	3.75403	1.15238	2.30774	4.26004			5.4121
	3.46154	4.76275	3.82625	1.8727	1.73077	3.24912			3.17517
	2.45187	3.17517	5.12558	2.66492	3.96629	3.61022			3.89674
	4.68739	5.19576	3.39308	4.03349	3.61241	4.1156			5.26782
	7.93258	4.69053	2.38232	3.60127	4.04589	7.00377			10.5356
	4.75961	4.54625	3.97053	1.94476	6.71897	2.23835			7.50476
	6.3461	3.96896	6.64173	1.51254	3.90145	3.03261			3.17517
	4.18264	7.8657	3.24864	5.55435	3.83535	2.67151			4.47403
	5.12008	5.55654	3.46515	9.88252	3.3956	4.54876			6.2059
	4.90374	1.4433	2.74326	2.88535	3.90145	1.44409			3.60802
	3.31725	6.42256	3.17642	1.87552	1.30043	2.95914			2.23694
	3.67788	7.8657	1.51599	3.17391	6.43009	11.1872			2.59788
	1.65871	5.77305	2.52676	1.58696	3.54019	6.27921			3.82452
	2.74044	5.19576	3.97053	3.88983	17.9175	2.09312			2.88645
	1.65871	4.54625	2.67104	2.52126	4.04589	2.67041			2.45344
	1.94711	2.74216	4.76464	2.01698	2.60086	5.99049			2.16487
	1.37014	4.47403	3.17642	4.25015	4.91284	4.98004			3.24723
	1.44236	2.95866	3.46515	4.39412	3.32338	3.17564			3.31945
	2.23552	3.46373	3.97053	1.00857	3.10672	7.43411			1.94837
	1.44236	2.38138	3.74837	9.01525	4.98506	2.74263			3.89187
	2.74044	1.6598	5.26217	8.65462	1.66169	3.46436			5.76583
	4.18264	6.13383	4.32504	2.52425	3.32338	1.73218			4.82885
	4.97596	2.23709	3.46012	2.88488	3.68463	6.92244			3.02696
	2.52409	2.81438	2.30664	1.73093	3.68463	1.87489			1.15316
	1.58648	6.49572	2.16252		3.03434	4.90342			1.36935
	3.60582	10.249	2.01839		3.32338	2.74012			1.65761
	2.0914	5.48527	2.30664		2.60086	4.11026			1.22523
	1.15379	2.38185	2.88346		2.16738	4.11026			2.09014
		1.01045	2.01839		2.23961	2.23537			1.94602
		7.43411	3.46012		10.833	5.69659			1.51348
		2.59835	1.65792		5.652	3.38916			0.79285
		5.05226	1.51379		8.949	4.62161			2.37839
		12.5586	0.937133		13.6483	5.48809			1.65761
		2.38185	1.65792		13.9372	8.30436			6.5626
		2.95914	7.35262		3.46625	9.53194			4.97596
		4.11403	1.72998		3.17737	6.21029			4.39898
		3.68102	3.46012		3.10515	1.37202			3.31725
		3.82531	2.30664		3.24959	3.31741			3.38947
		3.68086	4.18091		3.46625	6.99545			4.68755
		4.25831	2.52299		5.41603	4.61564			2.59615
		4.04181	2.81124		2.3831	3.89439			3.82217
		5.05226	1.08126		2.88849	3.10106			4.83167
		3.53658	2.30664		3.39403	1.65871			2.30774
		6.13493	1.29745		3.39403	2.74044			3.46154
		5.12448	1.72998		2.52754	5.04833			3.38947
		5.12448	2.30664		2.88849	1.73093			3.10091
		4.40275	4.46932		2.31088	6.92291			1.58648
		3.32008	2.45093		2.022	5.84119			4.25486
		4.33053	5.6947		2.31088	3.24519			2.95678
		2.88707	3.09965		1.51646	1.65855			2.45187
		3.17564	9.46082		2.3831	11.9709			2.52409
		1.44346	8.88306		3.24959	2.8125			3.5336
		2.74263	4.3332		3.53815	4.75945			1.65682
		2.59835	2.8888		6.28204	6.20181			4.68221
		1.94868	4.04432		3.68259	9.37478			2.95333
		2.59835	6.42758		6.42632	2.95662			2.80936
		3.17564	2.81658		11.3365	4.11042			3.16952
		4.11403	2.5277		5.12668	2.74028			1.87285
		3.32008	3.89988		4.33242				1.44063
		8.94979	5.63316		2.23835				5.47459
		1.5879	7.07756		2.96055				4.61015
		1.01045	2.09438		2.67167				2.88126
		2.09312	4.26098		2.81611				2.16095
		3.89909	4.6943		8.08723				2.4492
		3.82687	6.42758		5.99316				1.94492
		3.68243	3.9721		4.11576				1.65682
		5.55984	4.40542		2.67167
		3.97132	2.1666		3.03261
		3.89909	3.46656		1.58853
		5.05446	5.92204		2.74389
		2.67167	4.47764		1.58853
		3.53815	4.11654		2.09407
		8.37579	1.73328
		5.19874	5.27206
		3.10483	6.42758
		3.24927	3.82766
		3.53815	7.51088
		2.96039	3.68322
		4.11576	3.39434
		3.39371	2.96102
		8.66467	1.51662
		3.75466	6.1387
		3.24927	2.74436
		2.31057	3.9721
		2.16613	4.11654
		3.03261	4.04432
		7.22059	4.03631
		2.09391	3.60378
		2.67167	2.37855
		1.73297	1.72983
		3.24927	1.15316
		2.02169	4.54075
		2.09391	2.59474
		3.24927	3.67584
		4.40448	5.91026
		8.00637	3.09934
		7.42924	3.1714
		1.15411	3.09934
		7.86209	2.23442
		5.19325	2.95505
		5.69816	1.29729
		2.74091	2.44418
		2.74091	3.31553
		3.67867	2.01808
		3.31788	1.22523
		2.59662	1.80189
		2.52456	3.89988
		4.18342	4.54986
		2.09171	8.95528
		2.23599	3.89988
		2.16393	4.18876
		4.0393	3.17768
		2.88519	10.6163
		5.55403	6.28314
		4.39992	5.0554
		1.44252	2.45548
		1.5868	2.59992
		3.53438	1.87772
		1.22617	1.66106
		1.8033	3.68322
		5.55403	3.03324
			3.68322
			3.53878
			2.59411
			4.32362
			1.15301
			1.87348
			2.08967
			2.08967
			3.60865
			2.74263
			3.60865
			2.95914
			5.47883
			2.67041
			3.39214
			9.38263
			2.74263
			4.6191
			8.4444
			3.17564
			2.45391
			4.76354
			4.18609
			2.81485
			0.64841
			1.65698
			1.08063
			5.18697
			1.65698
			1.65698
			4.25863
			5.41352
			3.32024
			2.88723
			3.82546
			3.46468
			4.47513
			2.16534
			3.82546
			4.76385
			3.82546
			3.68118
			2.02106
			2.23756
			3.89768
			2.81501
			1.51584
			1.87662
			3.24802
			1.73234
			5.99175
			5.12558
			3.60959
			3.1042
			9.02389
			7.86884
			5.26986
			2.3101
			2.45454
			2.81548
			7.79662
			5.12558
			2.02137
			3.1042
			2.0936
			2.95976
			4.39537
			2.95427
			2.08967
			3.17046
			3.17046
			4.03506
