# Supplementary material for: The KASH5 protein involved in meiotic chromosomal movements is a novel dynein activating adaptor
Source: eLife. 2022 Jun 15;11:e78201. doi: 10.7554/eLife.78201 (PMC9242646; doi:10.7554/eLife.78201)
Supplement: Figure 4—source data 1. [file elife-78201-fig4-data1.xlsx]

## Sheet: Figure 4E
Figure 4E HC IP:Flag IP
WT	I36D	T40D	Y60D	V64D	R73D	L77D	F97D	L98D	M101D	GFP
3.37627	0.44229	0.902438	0.369936	0.422434	1.12763	0.0312914	0.0205566	0.0332574	0.133241	0.084526
9.80935	0.362163	1.41707	0.128966	3.86662	3.62211	0.16567	0.267628	1.81948	0.0285262	0.00972697
8.45493	0.594479	1.15561	0.555004	5.04029	3.44163	0.214764	0.116407	0.679191	0.061924	0.0394829

## Sheet: Figure 4G
Figure 4G % Processive events
WT	I36	T40	Y60	V64	R73	L77	F97	L98	M101
70.4348	74.7368	73.2456	51.9231	67.2316	65.9574	11.3636	29.7297	62.6087	23.4043
71.4286	62.2517	72.1154	73.0769	49.0741	59.1398	15.3846	13.8889	37.1134	10.8108
80.8081	82.8571	71.2644	69.1729	67.8261	51	32.3944	18.1818	90.0901	12.8205
60.1942	71.6049	60.8392	65.9259	60.5634	52.8926	22.6415	23.5294	74.1259	14.2857

## Sheet: Figure 4H
	Figure 4H Velocity (μm/s)
	WT	I36D	T40D	Y60D	V64D	R73D	L77D	F97D	L98D	M101D
	0.500202	0.9106	1.16902	0.8164	1.18347	0.60445	0.374916	0.449648	0.9106	0.917822
	0.900238	0.457498	0.968062	0.829902	1.11093	0.504598	0.256852	1.00825	0.486386	0.292962
	0.64056	0.741354	1.12129	1.6598	0.849684	0.498632	0.346342	0.869466	0.660342	0.662226
	0.817656	0.859418	0.815458	0.4082	0.850312	0.795362	0.590948	0.82111	0.229534	0.851254
	0.942	0.512448	1.15458	0.43175	0.974342	0.7536	0.325618	0.358902	0.793164	0.809806
	0.314	0.713722	0.932894	0.996636	1.20482	0.654062	0.732562	0.66882	1.007	0.528776
	0.267214	0.580272	0.8635	0.8164	3.2185	0.802584	0.323106	0.366438	0.719688	0.528148
	1.12129	0.777464	0.454358	0.829902	1.0676	0.79128	1.04656	0.462836	0.48513	0.614498
	0.732562	0.971516	1.08236	1.6598	0.777464	0.452474	0.819226	0.403804	0.889562	0.38936
	1.09084	0.409456	0.7222	0.4082	0.942	0.77087	0.991612	0.265958	0.451532	0.303952
	0.915938	0.6908	1.12318	0.43175	0.7222	0.953618	1.10811	0.166106	0.697708	0.86664
	0.7536	0.806038	0.504912	0.996636	1.11313	0.39407	0.964294	0.35325	0.418562	0.711838
	0.543848	0.86664	1.04656	0.61387	1.08707	0.785	0.7065	0.314	0.5966	0.986902
	1.0362	0.810434	1.04656	0.55264	0.3925	0.371148	0.881712	0.356704	1.0092	0.3768
	1.06069	0.8792	0.640246	0.43175	0.926928	0.25905	0.559234	0.264388	0.82425	0.590634
	0.942	0.765532	0.286996	0.464092	0.544162	0.3768	0.187144	0.267528	0.314	0.26062
	1.03997	1.10308	0.348854	0.50397	0.976854	0.300812	0.535056	0.983762	1.11658	0.90275
	1.01171	0.523438	0.496748	1.099	0.446194	0.82111	0.579644	0.5024	0.555466	0.38779
	0.964294	1.14673	0.318082	0.60288	1.099	0.5495	0.493294	0.628	0.603822	0.685148
	1.03463	0.508366	0.218858	0.628	0.279146	0.488584	0.7065	0.7065	0.785	0.290764
	0.766474	0.542278	0.397838	0.3768	0.785	0.868838	0.802584	0.283228	0.812004	0.583098
	0.669448	0.532858	0.187458	0.919392	0.403804	0.685148	0.697708	0.942	0.176468
	0.92944	0.575562	0.767416	0.7065	0.529718	0.614498	1.099	0.56834	0.397838
	1.04907	0.628	0.214776	1.099	0.942	0.671332	0.66097	1.15144	0.183062
	1.0205	1.0048	0.247432	0.60288	0.43018	0.5809	1.6598	0.443368	0.4239
	0.92944	1.01579	0.25277	0.628	0.7693	0.493294	0.381824	1.099	0.314
	0.90275	1.10371	0.398466	0.3768	0.67824	0.221056	0.314	0.74889	0.39721
	1.0654	0.5652	0.401292	0.757368	0.50711	0.51025	0.725968	0.265016	0.505854
	0.503656	0.768358	1.1662	0.490782	1.01328	0.884852	0.34383	0.639304	0.297358
	0.74575	0.884852	0.807294	0.45687	0.884852	0.157	0.628	0.448706	0.366438
	1.01799	0.644642	0.822366	0.493294	0.891446	0.283856	0.84466	0.964294	0.709012
	0.919706	0.314	0.403804	0.358902	0.554524	0.218544	0.586238	0.795362	0.6437
	1.5028	0.519984	0.314	0.296416	0.802584	0.487642	0.575562	1.256	1.00166
	0.777464	0.523438	0.3768	0.413224	0.792536	0.35325	0.669762	0.162338	0.641502
	0.849684	0.49141	1.17342	0.397838	0.696138	0.86821		1.01171	0.3768
	0.8478	0.375544	0.994438	0.418562	0.82896	0.38779		0.628	0.5024
	0.604136	0.356704	0.60759	0.297358	0.668506	1.01453		0.519356	0.74575
	0.67824	0.448706	0.476966	0.555466	0.422016	0.768672		0.2826	0.448706
	0.42547	0.314	0.12246	0.584668	0.261562	0.389988		0.4867	0.575562
	0.3297	0.626116	0.044274	0.66725	0.40192	0.652178		0.875746	0.52595
	0.98282	0.523438	0.785	0.239268	0.500516	0.602566		0.40035	0.990984
	0.843718	0.413538	0.860674	0.662854	0.885794	0.89176		0.424528	0.286368
	0.523438	0.2198	0.665052	0.242094	0.872292	0.569282		0.5338	0.495178
	0.598798	0.285426	0.695196	0.280402	0.767416	0.261562			0.74889
	0.356704	0.28103	1.0676	0.51025	0.405374	0.32656			0.358902
	0.542278	1.12663	0.813574	0.49926	1.06289	0.175212			0.401292
	1.23371	0.29987	1.07137	0.1727	0.538196	0.8007			0.471
	0.395326	0.3925	0.444938	0.479164	0.608532	0.538196			0.512448
	1.04028	0.695196	0.814202	0.586238	0.340062	0.61544			1.1888
	1.01736	0.152604	0.732562	0.45687	1.08142	0.477908			0.66725
	0.994438	0.5024	0.513704	0.497062	0.586238	0.413224			0.290764
	1.04656	0.23864	0.796932	0.970574	0.991612	0.512448			0.570852
	0.700534	0.43175	0.38465	0.45059	0.637734	0.716862			0.260306
	0.584982	0.157	0.727224	0.232674	0.219172	0.732562			0.446822
	0.649352	1.04656	0.801642	0.38936	0.785	0.488584			0.604764
	0.583098	0.272238	0.52752	0.541336	0.260306	1.0632			0.337236
	0.7222	1.01799	1.01579	0.650608	1.1103	0.594088			0.433634
	0.779034	0.955188	0.709954	0.414794	0.992554	0.284484			0.3454
	0.530032	0.301754	0.579644	0.35325	0.248374	0.488584			0.5495
	1.21895	0.831158	0.643072	0.539766	0.71592	0.740098			0.732562
	0.925358	1.01296	0.459068	0.46472	0.573364	0.628			0.305208
	0.74575	0.889562	0.658772	0.488584	0.794106	0.700534			0.497062
	0.827704	0.833356	0.811062	0.58875	0.443368	0.397838			0.426098
	0.895528	0.942	0.5495	0.785	0.93258	0.292334			0.858162
	0.50711	1.08142	0.682636	0.628	0.819854	0.314			0.132822
	0.913426	0.98125	0.428296	0.650294	0.976854	0.145382			0.446822
	0.101736	0.775894	0.424214	0.461894	0.33441	0.379312			0.604764
	0.337236	0.493294	1.256	0.289822	0.351052	0.19468			0.337236
	1.22994	0.175526	0.796932	0.523438	0.8164	0.538196			0.785
	0.578388	0.71592	0.383708	0.370206	0.323734	0.593146			0.433634
	0.4396	0.942	0.644642	0.814516	0.479792	0.57933			0.3454
	0.349796	0.433634	0.760194	0.785	0.342574	0.730678			0.5495
	0.807294	0.265958	0.181806	0.3454	0.323734	0.861616			0.732562
	1.38694	0.481362	0.520926	0.74418	0.558292	1.07953			0.305208
	0.7536	0.162024	0.11932	0.994438	0.363612	0.906204			0.497062
	0.28103	0.609474	0.432378	0.297358	0.465034	0.661284			0.426098
	0.20096	0.314	0.74575	0.665052	0.732562	0.711838			0.872292
	0.174584	0.140358	0.5338	0.35639	0.645584	0.55421			0.760822
	0.471	0.488584	0.478536	0.482932	0.244292	0.860046			0.561746
	0.558292	0.50711	0.48513	0.076616	0.6908	0.859732			0.545418
	0.3454	0.429552	0.523438	0.6594	0.44274	0.35011			0.418562
	0.82425	0.5338	0.5652	0.289822	0.8164	0.858162			0.55421
	0.889562	0.5652	0.471	0.603822	0.999148	0.438658			0.300812
	0.3768	0.774638	1.01736	0.523438	0.79128	0.423272			0.889562
	0.172072	1.1304	1.13511	0.461894	0.767416	0.495806			1.1618
	1.03746	0.59503	0.673216	0.724712	0.889562	0.335666			0.385278
	0.48513	0.2512	0.661598	0.396582	0.63742	0.412282			0.573992
	0.304894	0.952048	0.530032	0.96241	0.832728	0.773068			0.4553
	0.563002	0.917822	1.3458	0.471	0.8164	0.340062			0.385278
	1.01171	0.672902	0.314	0.329386	0.246176	0.386534			1.11313
	1.03808	0.12717	0.897098	0.457812	1.01014	0.656574			0.79913
	0.49455	0.641502	0.418562	0.38779	0.98125	0.397838			1.17028
	0.723142	0.976854	1.05975	0.216974	1.1304	0.599426			0.628
	1.21675	0.74889	0.964294	0.63428	0.728794	0.961782			0.694254
	0.579016	0.457812	0.796932	0.410712	0.465662	0.480106			0.807294
	0.619522	0.730992	0.758938	0.442426	0.727224	0.366438			0.383708
	1.04656	0.9106	0.887992	0.07379	0.413852	1.0318			0.374288
	0.8635	0.27161	1.06415	0.428924	0.603822	1.256			0.845288
	0.58404	0.508366	0.676984	0.201902	0.628	0.6437			1.77944
	0.482304	0.33441	0.807294	0.6908	0.230162	0.7065			0.28888
	0.486072	0.372718	0.545418	0.335038	0.2512	0.652178			0.583098
	1.02584	0.90589	0.168618	0.422644	0.351052	1.0048			0.342574
	0.641188	0.885794	0.670704	0.517158	0.877002	0.656574			0.51182
	0.650294	1.12004	0.1884	0.913426	0.743552	0.802584			0.445566
	0.738842	1.18127	0.773068	0.991612	0.8792	0.481362			0.628
	0.628	0.917822	0.35325	0.32656	1.05975	0.628			0.8478
	0.641502	1.07922	0.5495	1.0205	0.758938	0.460638			0.46472
	0.796932	1.06069	0.807294	0.628	0.457498	0.490782			0.374288
	0.32813	0.884852	0.608218	1.13825	0.2826	0.8478			0.409142
	0.428296	0.966178	0.406316	0.589692	0.39093	0.683264			0.518728
	0.8635	0.599426	1.11313	0.652492	0.471	0.732562			0.43489
	0.426098	0.515902	1.32571	0.874804	1.256	0.225766			0.389988
	0.961468	0.5495	0.37209	0.79913	0.897098	0.215404			0.5024
	0.508366	0.736644	0.198762	0.421388	0.3611	0.515902			0.583098
	0.485758	0.59817	0.381196	0.1884	0.412282	0.687974			0.587494
	0.471	0.964294	1.18629	0.628	0.726282	0.493294			0.90275
	0.875746	0.61544	1.15144	0.224196	0.366438	0.535684			0.827704
	0.399722	0.611358	2.0096	0.4396	0.342574	1.08142			0.732562
	0.43803	1.22994	0.58875	0.58875	0.611358	0.374288			0.889562
	0.305836	0.683264	0.471	0.471	0.999148	0.443996			1.3345
	0.738214	1.00668	0.560804	0.713722	0.77087	1.3816			0.349482
	0.874804	0.353878	0.402548	0.628	0.552326	0.8792			0.628
	0.952676	0.123402	0.58875	0.336294	0.900238	0.354192			0.803526
	0.415422	0.07065	0.736016	0.246804	0.65783	0.314			1.05975
	0.8321	0.529404	0.763334	0.558292	0.668506	0.314			0.59817
	0.611044	0.3925	0.613556	1.02584	0.50397	0.371148			0.621406
	0.796932	0.7379	0.84466	0.644642	0.39721	0.383708			0.42233
	0.686718	0.413224	0.498004	0.601938	0.347284	0.86664			0.747634
	0.50711	1.01673	0.98125	0.719374	0.562688	1.11658			0.628
	0.7222	0.762706	0.845288	0.555466	0.340062	0.8635			0.53066
	0.599426	0.338178	0.846544	0.382766	0.41448	0.740098			0.349796
	0.59503	0.884852	0.68766	0.389674	0.32028	0.650294			0.465976
	0.647468	0.628	0.877002	0.366438	0.523438	0.303638			0.7693
	0.45216	0.340062	0.846544	0.542278	0.695196	0.757368			0.573364
	0.294218	0.590006	0.843718	0.495806	0.820482	0.471			0.28731
	0.50711	1.0318	0.657516	0.47885	0.695196	0.5024			0.942
	0.538196	0.409142	0.643072	1.67456	0.5495	0.5495			0.874804
	0.487328	0.523438	0.48513	0.471	0.704302	0.672902			0.563944
	0.341632	0.528148	1.10811	0.732562	0.271296	0.462208			0.740098
	0.512448	0.2669	0.8792	1.03494	1.08142	0.36424			0.654062
	0.245234	0.649666	0.650294	0.628	0.853766	0.168932			0.523438
	0.683264	0.286682	0.795362	0.513076	0.66097	0.448706			0.60759
	0.162966	0.720316	0.8792	0.423272	0.424842	0.428296			0.563316
	0.415108	0.620778	0.37209	0.662854	0.38308	0.628			0.934778
	0.332526	0.31714	0.5652	0.695196	0.686718	0.209438			0.81169
	0.335038	0.476338	0.234244	0.3454	0.5652	0.471			0.74418
	0.368636	0.681694	0.8164	0.90903	0.369892	0.964294			0.760822
	0.393756	0.324048	0.5966	1.13825	0.357332	0.499574			0.410712
	0.688288	0.647468	0.683264	0.765218	0.3925	0.75046			0.804154
	0.763962	0.991612	0.884852	0.708698	0.869466	0.597542			0.517158
	0.64998	0.50711	1.099	0.573364	1.05975	1.04656			0.942
	0.649038	0.301126	1.0541	0.272552	0.280716	0.480106			0.609474
	1.08142	0.331584	0.531288	0.628	0.418562	0.51025			0.990356
	0.986902	0.595658	0.163594	0.069708	0.314	0.583098			0.6908
	0.430808	0.872292	0.173328	0.826448	0.459068	1.3816			0.806352
	0.61387	0.713722	0.212578	0.82425	0.7065	0.647782			0.80541
	0.994438	0.167362	0.198448	0.884852	0.263132	0.314			0.928498
	0.874804	0.3768	0.531288	0.46786	0.314	0.296416			0.460324
	0.504598	0.314	0.81483	0.114296	0.907146	0.490782			1.099
	0.35796	0.325932	0.314	0.558292	0.747634	0.523438			0.758938
	0.930696	0.9891	0.740098	0.513704	2.09344	0.628			0.809492
	0.3925	0.837438	0.579644	0.545418	0.685776	0.362356			1.19885
	0.9734	0.680438	0.181178	0.874804	0.617638	0.837438			0.834298
	0.6908	0.628	0.418562	0.555466	0.401292	0.5338			0.24021
	0.732562	0.531288	0.497062	1.04656	0.762706	0.348854			0.628
	0.727224	0.523438	0.43175	0.382138	0.58404	0.8164			0.538196
	0.283228	0.437716	0.405374	0.491096	0.340062	0.577446			0.097654
	0.116494	0.656574	1.02992	0.913426	0.338178	0.774638			0.917822
	0.595658	0.190284	0.482618	0.59189	0.356704	0.413852			0.942
	0.592204	0.362356	0.942	0.614498	1.36056	0.517786			0.095456
	0.79913	0.248688	1.099	0.5495	0.362356	0.488584			0.335038
	0.727224	0.32499	0.515902	0.942	0.443368	0.608532			0.433634
	0.34697	0.645584	0.682636	0.245234	0.294218	0.827704			0.327502
	0.256852	0.560804	0.591262	0.397838	0.278204	0.5966			0.089804
	0.380254	0.168618	0.907146	0.242094	1.31064	0.418562			0.758938
	0.322164	1.0362	0.84466	0.740098	0.523438	0.5966			0.662854
	0.453416	0.628	0.600682	0.209438	0.440856	0.324048			0.364868
	0.569282	0.244292	1.1417	0.54636	0.90903	0.82111			0.314
	0.43646	0.505854	0.9263	0.51182	0.277576	0.546046			0.8321
	0.256852	0.560804	1.12129	0.36424	0.468488	0.493294			0.5024
	1.3816	0.932266	0.6908	0.794106	0.68766	0.601938			0.628
	0.224196	0.8792	0.43489	0.49141	0.949222	1.15144			0.919078
	0.428296	0.98125	0.72063	0.423272	0.67824	0.443368			0.460638
	0.410084	0.90589	0.665994	0.577446	0.529404	1.04028			0.418562
	0.61858	0.800072	1.11658	0.778092	0.523438	0.785			0.99224
	0.540708	0.883282	0.942	0.261562	0.356704	0.454358			0.569282
	0.923474	0.750146	0.471	0.4396	1.15144	0.727224			0.299242
	1.03432	0.59817	0.446194	0.3768	1.15144	0.842148			0.772126
	0.336922	1.15144	0.772754	0.523438	0.385278	0.414794			0.970574
	0.528148	0.649038	0.572736	0.168618	0.82425	1.3188			0.512762
	0.802584	0.802584	0.20567	0.37366	0.732562	0.732562			0.4396
	0.298928	0.942	0.710582	1.01328	0.478536	0.968062			0.5652
	0.66725	1.0318	0.693312	0.393756	0.453416	0.471			0.5652
	0.314	1.6328	1.0877	0.571794	0.569282	0.442426			0.597542
	0.241466	0.358902	0.292962	0.697708	0.43175	0.785			0.638676
	0.63271	0.686718	0.266272	0.460638	0.348854	0.428296			0.154802
	0.467546	0.593146	0.471	0.410712	0.263132	0.296416			0.498632
	1.1888	0.428296	0.151348	0.662854	0.314	0.837438			0.143812
	0.405374	1.413	0.294218	1.04122	0.114296	0.8478			0.237698
	0.785	0.127798	0.0628	0.429552	0.2512	1.07671			1.0048
	0.601938	0.644642	3.0615	0.498632	0.37366	0.609474			0.396582
	0.37209	0.58875	0.546046	0.340062	0.488584	0.464092			0.814516
	0.628	0.508366	0.37366	0.762706	0.335038	0.540708			0.59503
	0.1884	0.732562	0.314	0.493294	0.185574	0.358902			0.773068
	0.628	0.302382	1.01799	0.083838	0.462836	0.7065			0.773068
	0.572736	0.531288	0.637734	0.448706	2.6376	0.854708			0.177096
	0.882968	0.387162	0.650294	0.4082	0.383708	0.41291			0.136904
	0.780604	0.279146	0.561746	0.261562	0.616382	0.942			0.426098
	0.498632	1.07137	0.686718	0.362356	0.762706	1.01956			0.64527
	0.333154	0.26847	0.526578	0.785	0.333782	0.568654			0.94985
	0.762706	0.324676	1.1304	0.599426	0.283856	0.858162			0.8792
	0.716234	0.463464	0.8164	0.561746	0.831786	0.378998			0.552012
	0.747634	0.330642	0.528148	0.608532	0.676984	0.52909			0.2355
	0.478536	0.418562	0.56834	1.256	1.02584	0.795362			0.593146
	1.0227	0.720316	0.579644	0.4082	0.366438	0.727224			0.075046
	0.409456	0.620778	0.358902	0.583098	0.5966	0.416364			0.385278
	0.46472	0.476338	0.464092	0.728794	0.699278	0.41134			0.561746
	0.295474	0.681694	0.758938	0.38779	0.645584	1.0676			1.05975
	0.300498	0.324048	0.717804	0.776836	0.651236	0.49612			0.526578
	0.31871	0.647468	0.542278	0.571794	1.07294	0.732562			0.66568
	0.589378	0.991612	1.256	0.412282	0.882968	0.74104			0.841206
	0.43489	0.50711	0.599426	0.115552	0.39093	0.868838			0.712152
	0.5024	0.646526	1.099	0.433006	0.912484	0.923474			0.480106
	0.542278	1.01767	0.82425	0.468488	0.428924	0.991612			0.538196
	0.451218	0.74418	0.870094	0.5024	0.14444	0.59503			0.758938
	0.575562	0.762706	0.556094	0.955188	0.795048	0.421074			0.4396
	0.562688	0.79913	0.454672	0.897098	0.512448	1.62715			0.8164
	0.610416	0.897098	0.355762	0.538196	1.07576	0.223254			1.08707
	0.594716	0.82896	0.397838	0.218858	0.83053	1.1417			0.649038
	0.614498	0.8792	0.523438	0.732562	0.153546	0.737272			1.07671
	0.837438	0.41134	0.41134	0.979052	0.221684	0.471			0.385906
	0.43175	0.628	0.976854	0.493294	0.558292	0.134706			0.965236
	0.757368	1.256	0.378684	0.512448	0.732562	0.19782			1.22743
	0.363612	0.6908	0.265644	0.942	0.481362	0.6594			0.942
	0.5024	0.131566	0.300812	0.965236	0.515902	1.01799			0.345714
	0.314	0.399722	0.141928	1.11313	0.809806	0.924416			0.955188
	0.418562	0.924416	0.314	0.1884	0.680438	0.523438			0.8164
	0.3925	0.526264	0.212264	0.35482	0.542278	0.278518			0.986902
	0.5652	1.0205	0.46472	1.07294	0.6908	0.5652			0.232046
	0.2041	1.11658	0.748262	0.35325	0.410712	0.394384			0.922532
	0.7065	0.716548	0.386534	0.934778	0.363612	0.670704			0.406944
	0.5652	0.82111	0.429238	0.459068	0.5809	0.5652			0.53694
	0.338178	0.462208	0.958642	0.517158	0.697708	0.563316			0.448706
	0.560804	0.883282	1.11313	0.675414	0.42547	0.55421			0.401292
	0.628	0.443368	0.809806	0.328758	0.41762	0.656574			0.8792
	0.603194	0.841206	0.490468	1.0205	0.430808	0.845288			0.418562
	0.297672	0.471	1.09209	0.8164	0.915938	0.942			0.713722
	0.32499	0.819226	0.859418	0.573992	1.15144	0.412596			0.193738
	0.785	0.90118	0.892388	0.721258	0.399094	0.496434			0.471
	0.395954	1.02521	0.558292	1.0048	1.11878	1.3031			1.3345
	0.56834	0.357018	0.68609	0.7379	0.826448	0.882968			0.654062
	0.374916	0.7379	0.761764	0.38936	0.7536	0.44117			0.732562
	0.67039	0.8792	1.0833	0.715606	0.829902	0.256852			0.767416
	0.66725	0.493294	0.68766	0.39407	0.8635	0.475396			0.599426
	0.636164	0.380254	0.823308	0.504598	0.360472	0.942			0.986902
	0.616382	0.246176	0.842776	0.82896	0.889562	0.662854			0.720944
	1.0541	0.354506	0.8792	0.162338	0.847172	0.832728			0.872292
	0.436146	0.140044	0.761764	0.38779	0.961468	0.35325			0.388418
	0.324362	0.966178	0.389674	0.480106	0.44745	0.680438			0.447136
	0.796932	0.46472	0.599426	0.04867	0.48513	0.529404			0.727852
	0.515902	0.919706	0.777464	0.358902	0.837438	1.08989			0.461894
	0.655318	0.363612	0.875746	0.51025	0.837438	0.403804			0.383708
	0.762706	0.600682	0.655632	0.774638	0.785	0.785			0.346028
	0.728794	0.49141	0.546674	1.256	1.12129	0.559234			0.545732
	0.986902	0.680438	0.5181	1.20764	0.70336	0.330956			0.763962
	0.796932	1.099	0.639618	0.5652	0.912484	0.608532			0.960526
	0.746692	0.8635	0.802584	1.099	1.05975	0.5495			0.8635
	1.01171	0.728166	0.942	0.895528	1.04185	0.331898			0.695196
	0.309604	0.493294	0.3768	0.705244	0.819854	0.618266			0.329386
	0.418562	0.897098	0.331584	0.897098	0.892388	0.13659			0.872292
	0.656574	0.490154	0.986902	0.583098	0.5652	0.858162			0.811062
	0.942	0.900552	0.50711	0.51182	0.901494	0.347598			0.665052
	0.802584	0.738842	0.457812	1.3816	1.099	0.496748			0.756426
	0.74575	0.49141	0.595658	0.7065	0.938232	0.433634			0.348854
	0.7222	0.618266	0.611358	0.646526	1.099	0.193738			0.970574
	0.498632	0.351052	1.09084	0.628	1.02772	0.52124			0.3768
	0.662854	0.9734	0.493294	0.88234	0.368008	0.401292			0.321222
	0.628	0.443996	0.407258	1.00825	0.760194	0.363612			0.465976
	0.811062	0.558292	0.575562	0.628	0.964294	0.979994			0.530032
	0.448706	0.41448	0.302382	0.957386	0.424842	0.441798			0.737272
	0.41134	0.401292	0.996636	0.523438	1.20356	0.407258			0.930382
	0.36424	0.48513	0.495806	0.457812	0.498004	0.5024			1.00166
	0.637106	0.74889	0.430494	0.40506	0.889562	0.685148			1.01453
	0.687032	0.371148	0.45687	0.2512	0.48513	0.544162			0.279146
	0.8635	0.46315	0.672902		0.42547	0.73633			0.459068
	0.413224	0.857534	0.8792		0.68766	1.1932			0.515902
	0.395954	0.852196	0.837438		0.088862	0.8949			0.355762
	0.558292	0.740098	0.697708		1.04656	0.497062			0.505854
		0.5495	0.8792		0.74889	0.695196			0.385278
		0.735074	0.717804		0.471	0.855336			0.119948
		0.471	0.656574		0.628	1.13511			0.215718
		0.183062	1.3188		0.229534	0.574306			0.575562
		0.925986	0.157		1.05975	0.95456			0.380254
		0.8635	0.109272		1.01014	0.435204			0.92159
		0.757368	0.444938		0.7536	1.21895			0.570224
		0.344144	0.579644		0.531288	0.643072			0.445566
		0.593146	0.396582		0.794106	0.5966			0.7222
		0.792536	0.628		0.785	0.465976			0.819854
		0.842776	0.827704		0.886736	0.823308			0.551698
		0.402862	0.915938		0.480734	0.490154			0.807294
		0.428924	0.720316		0.796932	0.7065			0.449648
		0.8792	0.3925		0.837438	0.750146			1.0519
		0.404746	0.436774		0.461266	0.555466			0.40192
		0.889562	0.35325		0.476024	0.795362			0.942
		0.969318	0.5024		0.610416	0.333154			1.22994
		0.857534	0.913426		1.04656	0.30144			0.900238
		0.798188	1.62244		0.5024	0.701162			0.300498
		0.498004	0.242722		0.338178	0.687346			1.02929
		0.509308	0.800072		0.837438	0.785			1.07294
		0.59817	0.6751		0.5495	0.34383			0.66725
		0.628	0.956758		0.43175	0.854394			0.999148
		0.369264	1.07294		0.743552	0.349796			0.904948
		0.628	0.570852		0.415736	0.942			1.0318
		0.628	1.04656		0.975598	0.964294			1.0205
		0.446194	0.428924		1.00072	0.425156			0.715292
		0.942	1.11784		0.822052	0.081012			0.214776
		1.06289	0.874804		0.912798	0.8949			0.727224
		1.4915	0.732562		1.39353	0.41134			0.8164
		0.849684	0.446194		1.256	0.594716			0.3925
		0.998206	0.942		0.884852	0.913426			1.08487
		0.493294	0.93258		0.357646	0.785			1.05755
		0.104562	1.13825		0.683264	0.383708			0.966178
		1.13825	0.88234		0.4082	0.872292			0.942
		0.546988	0.51025		0.639304	0.5809			0.593146
		0.519984	0.635222		0.965236	0.677926			0.4239
		1.1439	0.66411		0.688288	0.796932			0.424842
		0.895528	1.06415		0.387162	0.719688			1.0362
		0.66411	0.336294		1.3188	0.485758			0.8635
		0.67824	0.579644		0.300498	0.331584			0.416992
		0.709012	0.468174		0.361728	0.5024			1.03463
		0.528148	0.39721		0.329072	0.48513			0.740412
		1.099	0.852196		0.9106	1.30844			0.374288
		0.700534	0.5024		0.575562	0.157			1.08613
		0.685148	0.818598		0.482304	0.369264			0.942
		0.54008	0.635222		0.154488	0.217288			1.1775
		0.883282	0.616382		1.08487	0.5024			0.50554
		0.4396	0.742296		0.986902	0.348854			0.269098
		1.17028	0.571794		1.09084	0.448706			0.942
		0.416364	1.13511		0.966178	0.628			0.985646
		0.86821	0.459696		0.795362	0.958642			1.04656
		0.966178	0.82425		0.893644	0.622976			0.478536
		0.8164	0.556094		0.4082	0.670704			0.74575
		0.217288	0.56834		0.28103	0.757368			0.093258
		1.256	0.523438		0.794734	0.5495			0.194052
		0.58875	0.559234		0.688602	0.380254			1.0205
		0.471	0.70336		0.917822	0.363612			0.942
		0.668192	1.03432		0.524694	0.3768			0.785
		0.395954	0.98125		0.687032	0.826762			1.15144
		0.553268	0.41448		0.296102	0.807294			0.43175
		0.579644	0.342574		0.325304	0.837438			0.5495
		0.942	0.218544		0.649038	0.47728			0.43018
		0.586238	0.618266		0.484188	0.43646			0.712152
		0.535684	0.49141		0.990356	0.4396			0.913426
		0.504598	1.1439		0.43489	0.314			1.04656
		1.06415	0.485758		0.976854	0.685148			0.8478
		1.02521	0.61387		0.898354	0.8321			0.732562
		0.455614	0.3454		1.0563	0.795362			1.01673
		0.12246	0.54008		0.62172	0.8164			0.744808
		0.950792	0.608532		0.579644	0.18369			0.8164
		0.45216	0.757368		0.37837	0.523438			1.1304
		0.708698	0.085722		0.852196	0.2983			0.17584
		0.628	0.483874		0.314	0.448706			0.837438
		0.518728	1.60485		0.8635	0.7065			0.314
		0.593146	0.462836			0.762706			0.717804
		0.760194	0.190598			0.43489			0.401292
		0.942	0.314			0.942			0.822366
		0.785	0.385278			0.583098			0.807294
		0.44431	0.43018			0.685148			0.426098
		0.827704	0.628			0.256852			0.680438
		0.512448	0.5652			0.785			0.532544
		0.3768	0.700534			0.424842			0.56834
		0.8792	0.812632			0.51025			1.13825
		0.465034	0.577132			1.1618			0.4082
		0.402862	0.9106			0.536312			0.717804
		0.832728	0.955502			1.04656			1.05002
		0.570852	0.260306			1.12129			0.493294
		0.575562	0.35325			0.409456			1.2403
		0.699278	0.480106			0.36895			0.575562
		0.410712	0.555466			0.21666			0.158884
		0.603822	0.762706			0.471			0.801328
		1.099	0.732562			0.2512			0.790338
		0.628	0.552326			0.493294			1.0048
		0.540708	0.35796			0.560804			0.785
		0.695196	0.314			0.112098			0.907146
		0.950164	0.628			0.438344			0.418562
		0.807294	0.628			0.441798			0.486072
		0.904948	0.742296			0.228278			0.382766
		1.20356	0.700534			0.542278			0.134706
		0.700534	1.01171			0.140672			0.101422
		0.872292	0.628			0.104562			0.872292
		0.645898	0.373032			0.261562			1.10654
		0.755798	0.448706			0.582156			0.144126
		0.698336	0.495178			0.610102			0.51025
		0.639618	0.425784			0.656574			1.00731
		0.99695	0.400664			0.354192			0.769614
		0.482932	0.220114			0.212264			1.0563
		0.416364	0.949222			0.9106			0.713722
		0.418562	0.917822			0.123716			0.829902
		0.8792	0.478536			0.560804			1.10811
		0.296416	0.517472			0.215718			0.777464
		0.035482	0.600682			0.224196			0.35325
		0.471	0.48513			0.568968			1.15144
		0.601938	0.50554			0.314			1.06101
		0.713722	0.505854			0.542278			0.97183
		0.889562	0.556722			0.362042			0.38936
		0.401606	0.067196			0.4396			0.628
		0.2983	0.27789			0.428296			0.46158
		0.999148	0.3925			0.986902			0.4396
		1.11784	0.98282			0.45687			0.628
		0.432378	0.90275			0.538196			0.7065
		0.724398	0.093886			0.542278
		0.900238	0.80541			0.362042
		0.656574	0.785			0.4396
		1.26636	0.628			0.428296
		0.82425	0.785			0.986902
		0.86978	0.8321			0.45687
		0.553582	0.579644			0.538196
		0.586238	0.628
		1.0048	0.3768
		0.74104	0.53694
		0.692056	0.339748
		0.998206	0.53694
		0.498632	0.66725
		0.245548	0.382138
		0.609474	0.347598
		0.771812	1.05975
		0.570852	0.644642
		0.426098	1.6485
		0.36424	0.742296
		0.531288	0.942
		0.628	0.358902
		0.41605	0.766474
		0.347284	0.969318
		1.3816	0.356704
		0.758938	0.643072
		0.8164	0.740412
		0.97968	0.658144
		1.0048	0.337236
		1.29525	0.418562
		0.58404	0.561746
		0.867582	0.583098
		0.82111	0.477594
		0.616068	0.543848
		0.768358	0.338178
		0.561746	0.54008
		0.553268	0.650294
		0.356704	0.715292
		0.569282	0.407572
		0.774638	0.495178
		0.325618	0.233616
		0.538196	0.986902
		1.1034	0.8635
		0.610416	0.76459
		0.807294
		0.683892
		1.06069
		0.750774
		0.405374
		0.685148
		0.7222
		0.447764
		0.358902
		0.476338
		0.352308
		0.415422
		0.465662
		0.628
		0.497062
		0.4553
		0.373032
		1.00825
		0.844346
		0.747948
		1.02835
		0.8635
		1.1304
		0.745122
		0.881084
		0.497062
		0.923474
		0.542278
		0.904948
		0.288252
		0.628
		0.827704
		0.252142
		0.362356
		0.697708
