# Supplementary material for: The KASH5 protein involved in meiotic chromosomal movements is a novel dynein activating adaptor
Source: eLife. 2022 Jun 15;11:e78201. doi: 10.7554/eLife.78201 (PMC9242646; doi:10.7554/eLife.78201)
Supplement: Figure 5—source data 1. [file elife-78201-fig5-data1.xlsx]

## Sheet: Figure 5B
Figure 5B Dynein Intensity (Nucleus:Cytoplasm)
-SUN1/-KASH5	+SUN1/-KASH5	+SUN1/+KASH5ΔTM	+SUN1/+KASH5 FL	+SUN1/+KASH5 FL L77D	+SUN1/+KASH5 FL F97D	+SUN1/+KASH5 FL M101D
1.27272	1.35767	1.49428	1.69019	1.46392	1.28215	1.40363
1.28615	1.29619	1.55949	2.2666	1.11191	1.3664	1.66907
1.7528	1.16682	1.50504	1.7026	1.38899	1.40863	1.49535
1.77134	1.1722	1.08481	1.95024	1.33836	1.50147	1.34153
1.19862	1.33061	1.10404	1.76919	1.14107	1.08791	1.81958
1.10728	1.0767	1.33419	2.18829	1.35675	1.31917	1.1818
1.1692	1.03503	1.13272	1.90267	1.39174	1.20795	0.970141
1.40028	0.951797	2.02831	2.46618	1.47135	1.18147	1.78585
1.12592	0.884579	1.17505	2.22397	1.52621	1.60486	1.63988
1.25282	1.07694	1.07073	2.57294	1.55499	1.38785	2.24139
1.23124	1.34645	1.47895	2.20919	1.31958	1.29066	1.39261
0.855543	1.10315	1.38775	1.46856	1.05414	1.41935	1.32684
1.13736	1.13188	1.23847	1.36769	2.03593	1.51394	1.42343
1.29768	0.944791	2.05446	1.14309	1.38652	1.30394	1.92351
1.61009	1.18199	1.39024	1.32415	1.78662	1.30084	2.0003
1.31292	1.3682	1.15001	1.85968	1.32281	1.73428	1.65222
1.03671	1.22264	1.25274	2.30397	1.43696	1.45557	1.82267
1.37995	1.20039	1.3558	1.94509	1.21572	1.17125	1.61787
1.32747	1.02869	1.30305	1.82009	1.11366	1.38293	1.26905
1.17967	1.43968	1.3491	1.6029	1.41965	1.40082	1.39316
1.23918	1.4136	1.50144	1.73619	1.61097	1.48118	1.87639
1.34597	1.16157	1.35464	2.034	1.25933	1.37545	1.9286
2.16362	1.11367	1.59753	1.54207	1.64415	1.51248	1.82425
1.21479	1.417	1.13874	2.02383	1.29288	1.38838	1.52162
1.25302	1.20781	1.29008	2.0976	1.64315	1.13656	1.68771
1.23448	1.14014	1.21072	1.9387	1.90631	1.38088	1.60221
1.70601	1.32255	1.61128	1.47224	1.2417	1.3392	2.01652
1.11682	1.56278	1.326	1.69965	1.7269	1.50011	2.27884
1.56361	0.974322	1.03692	2.02001	1.86983	1.44452	1.43976
1.20271	0.988033	1.24781	1.52016	1.74187	1.25872	1.8779
1.52008	0.919754	2.04815	1.46148	1.28356	1.16159	1.86749
1.46229	1.26906	1.34106	1.4472	1.8446	1.51792	1.5249
1.199	1.09502	1.3062	1.78854	1.54877	1.43829	2.3743
1.0858	1.05391	1.52243	2.13265	1.56895	0.979471	1.7093
1.27493	1.12054	1.35591	1.52091	1.48688	1.12314	2.19143
1.16369	1.26385	1.64567	1.81148	2.14278	1.27374	1.64678
1.30039	1.32006	1.4111	1.72823	1.63849	2.27413	1.83258
1.3493	1.21505	1.4639	1.5166	1.86446	1.19	1.69722
1.02982	1.36798	1.46622	1.41355	1.24403	1.3425	1.5183
1.35654	1.1749	1.45038	1.34491	1.39393	1.61177	2.00638
1.30749	1.1891	1.54557	1.18192	1.75329	1.57736	1.73161
1.48404	1.26196	1.36699	1.56013	2.09744	1.33763	1.79154
1.88005	2.23154	1.01213	2.23013	1.69339	1.56769	1.58202
1.05392	1.92418	1.51701	2.19767	1.57399	1.79363	1.68681
1.15503	1.61216	1.56485	3.07628	1.59321	1.47983	1.86681
1.27831	1.14104		2.15796		1.64085
1.0389	1.25333		1.95914		1.70086
1.49758	1.46567		2.22087		1.64939
1.00006	1.44733		2.18806		1.59465
1.22142	1.54111		1.82438		1.58385
1.48231	2.03328		1.76839		2.01363
1.68396	1.56711		2.24341		1.20994
2.28797	1.34648		1.83675		1.43631
1.62884	1.28605		2.39795		1.6966
1.59835	1.58094		4.03263		1.63493
1.93233	1.5871		3.1852		1.86734
1.29589	2.02928		1.98494		1.71131
1.19672	2.17132		2.35348		1.45871
1.26156	1.45894		1.87551		1.73555
1.63173	1.51212		2.26042		2.10197
1.78339	1.16238		2.03407		1.99154
1.73707	1.18292		1.97257		1.651
1.40039	1.61863		1.43605		1.64906
2.05647	0.981139		1.77024		1.60908
1.84262	1.33718		1.84043		1.02706
1.69229	1.511		1.58204		1.5475
1.53142	1.84601		1.55615
1.89511			2.15107
1.5681			2.88319
1.91973			2.84148
1.63285			1.9138
1.82644			2.27706
1.98814			4.09073
1.57025			1.7167
1.39389			2.08739
1.33643			1.8066
1.58418			2.40145
1.40073			2.03475
1.26424			2.23674
1.50581			2.27555
2.1354			2.03316
1.58562			1.95926
2.22177			1.92344
1.4178			1.55345
1.57975			2.00256
1.46861			2.05135
1.54788			2.48601
1.54202			1.50804
1.51693			1.91378
1.7281			2.13884
1.94539			1.65872
1.78392			1.65644
1.61303			1.86247
1.61648			2.00777
			1.4265
			1.62715
			1.88498
			1.84329
			2.85742
			3.13834
			2.29081
			2.23976

## Sheet: Figure 5C
	Figure 5C KASH5 Intensity (Nucleus:Cytoplasm)
	+SUN1/+KASH5ΔTM	+SUN1/+KASH5 FL	+SUN1/+KASH5 FL L77D	+SUN1/+KASH5 FL F97D	+SUN1/+KASH5 FL M101D
	1.36187	1.69939	2.53362	2.00474	4.06707
	1.77149	2.11791	2.22362	2.01806	3.88391
	1.41041	1.68287	2.42304	2.89289	3.03784
	1.12665	2.32599	2.57786	2.84202	3.03091
	1.13126	2.04089	3.28091	1.88898	4.34704
	1.30606	2.16238	3.59563	1.84892	3.50346
	1.17766	1.86918	2.34368	2.78268	3.11586
	1.84607	2.28234	2.28489	2.1598	2.77724
	1.19056	2.24308	4.71483	3.59207	2.12246
	1.12163	2.82949	4.2625	2.50218	4.314
	1.36041	2.80996	2.94359	2.45745	5.22548
	1.33909	2.00482	2.33875	2.26614	4.42678
	1.23875	1.87424	2.72209	2.3831	4.34548
	1.77909	1.74545	3.15519	1.64359	3.22271
	1.36951	2.2475	2.66288	2.83927	2.7366
	1.21432	2.20781	3.06857	2.09717	3.69859
	1.24373	2.41318	3.57924	3.28123	2.961
	1.39785	2.78263	2.86473	3.18015	2.45069
	1.24507	2.94628	3.01564	2.65826	2.44641
	1.31192	2.56085	3.53285	2.0473	3.1832
	1.42892	2.63598	3.33684	2.07615	2.17196
	1.39149	2.275	2.23293	1.92869	2.61061
	1.42954	1.85193	4.0406	1.96771	3.44773
	1.13615	2.79793	3.36969	1.93335	4.36507
	1.23035	3.02739	2.08216	2.53397	4.56396
	1.19178	2.95216	3.45723	2.19408	2.1097
	1.40517	2.36205	2.13376	2.08977	4.79582
	1.25684	2.34114	3.80193	2.94553	6.21925
	1.03449	2.03675	5.56324	3.10253	2.99121
	1.18831	1.6032	5.40846	2.46366	3.91285
	1.7167	1.54244	1.9318	2.24108	3.35736
	1.31694	1.86121	3.68515	2.35721	3.92132
	1.1862	2.13401	3.81099	2.1153	2.7535
	1.40702	2.7345	4.3317	2.54108	2.01688
	1.29943	1.61808	2.09363	2.62734	5.76618
	1.48794	2.11448	4.80658	2.03585	3.57462
	1.39725	2.2706	4.42031	3.18876	2.36183
	1.36277	2.18678	5.08752	3.3161	3.07279
	1.45069	1.62454	1.82418	2.71153	2.12449
	1.41074	1.93379	2.10741	2.95166	2.83432
	1.35192	1.74176	4.84842	2.36901	2.61264
	1.32248	1.96903	3.08535	2.10896	3.90486
	1.09614	2.14697	4.04166	2.55566	2.86374
	1.5492	2.28447	3.61872	3.1511	2.41975
	1.56225	3.04617	3.00153	2.70562	2.63058
		2.14135		2.00872
		1.97977		2.63999
		3.02643		2.60555
		3.12336		2.25662
		1.47285		2.50595
		1.23097		2.10849
		2.00877		1.73829
		2.0704		2.08494
		2.32717		1.68037
		3.77887		2.66985
		2.99971		3.49018
		2.64333		2.01554
		2.30454		2.05279
		1.79002		2.58097
		3.45415		2.23998
		1.81465		2.51798
		3.19481		2.31361
		1.31664		2.46773
		1.84513		2.55321
		2.02813		2.68043
		1.74083		2.92568
		1.71327
		1.44732
		2.94702
		2.45144
		1.54255
		2.61998
		4.20086
		1.32862
		1.75146
		1.321
		2.58347
		2.04519
		2.06554
		2.50665
		1.92139
		1.63281
		1.76693
		1.33459
		2.40732
		2.19003
		2.71884
		1.21804
		1.40718
		1.99621
		1.94768
		2.02717
		2.09759
		2.11853
		1.25846
		1.35031
		2.00593
		1.75504
		3.11446
		3.09465
		2.93906
		3.02424
