# Supplementary material for: The KASH5 protein involved in meiotic chromosomal movements is a novel dynein activating adaptor
Source: eLife. 2022 Jun 15;11:e78201. doi: 10.7554/eLife.78201 (PMC9242646; doi:10.7554/eLife.78201)
Supplement: Figure 6—figure supplement 1—source data 1. [file elife-78201-fig6-figsupp1-data1.xlsx]

## Sheet: Figure 6-supp C
Figure 6 SC Relative p150 focus intensity (A.U.)
	WT	Double mutant F167D-M171D	Triple mutant L147D-F167D-M171D
	0.499368	0.659239	0.871924
	0.701408	0.538875	0.128245
	0.639076	0.837636	0.000143298
	0.394049	0.633447	0.38187
	0.639076	1.00959	1.00518
	0.667018	1.07407	1.6113
	0.452082	0.899968	2.02183
	0.548803	0.601207	2.03688
	0.804577	0.706525	1.77036
	0.415543	0.575414	1.31039
	0.42629	0.932208	0.807443
	0.499368	0.906416	1.86063
	0.752992	0.755961	2.16584
	0.748694	0.753811	1.22442
	0.415543	0.635596	0.132544
	0.791681	0.869877	2.37433
	0.806726	0.740915	0.994437
	0.523011	0.955851	1.4458
	0.490771	1.07407	1.51888
	0.411244	0.947254	0.551669
	0.800278	1.7134	0.760067
	0.462829	1.60163	0.330195
	0.348913	1.71985	0.745022
	1.34192	1.24699	0.745022
	0.688512	1.11803	0.760067
	1.34192	1.61453	0.826698
	0.293029	1.8832	0.925568
	0.785233	1.29642	1.04163
	0.449933	2.09383	0.646151
	1.11408	1.6919	0.351689
	0.473576	1.79292	0.648301
	0.647674	1.45333	0.813801
	0.791681	1.85741	0.689139
	1.02596	1.79292	0.871834
	0.785233	1.74779	0.525787
	0.854012	1.04065	0.487099
	0.783084	1.57799	0.609612
	0.624031	1.24699	0.465605
	0.907746	1.44043	0.38178
	0.948584	1.39744	0.278611
	0.639793	1.3092	0.262938
	0.811742	1.97765	0.475725
	0.450649	2.34304	0.301627
	1.08901	1.59936	0.265088
	0.936405	2.14315	0.381153
	1.01808	1.90457	0.480024
	0.543072	2.27426	0.344614
	0.764456	1.69393	0.297328
	0.128245	2.72348	0.437037
	1.15349	1.9712	0.372556
	0.895567	3.29306	0.217802
	0.71717	2.54723	0.230698
	0.848281	1.60796	0.000716446
	0.869774	2.14315	0.0523011
	0.992288	1.25117	0.116782
	0.98369	2.36239	0.318822
	1.20507	1.76486	0.200607
	0.923508	1.67889	0.413394
	0.755858	3.70144	0.381153
	0.914911	1.32424	0.353211
	2.56562	0.705707	0.413214
	1.39637	0.621882	0.795801
	2.09061	0.641226	0.346584
	2.53768	0.505816	0.720573
	1.39637	0.778785	0.66254
	1.68438	0.62833	0.812995
	2.14649	0.342465	0.679735
	2.29695	0.514413	0.62815
	2.76981	0.783084	0.400318
	2.60646	0.62833	0.99784
	3.67899	1.23875	0.62815
	2.96755	0.804577	0.353032
	3.58657	1.13773	0.593761
	2.26041	0.720752	0.303597
	2.90522	0.705707	0.754963
	2.03903	0.611135	0.555072
	3.02128	0.565998	0.739917
	2.58281	0.305926	0.297149
	1.70588	0.415543	0.400318
	2.15294	0.679914	0.828041
	0.508324	0.00491281	0.351127
	0.656629	1.12258	0.64559
	0.499726	0.131725	0.245809
	0.48683	0.0436013	0.460745
	0.52122	0.703455	0.699324
	0.458888	0.791579	0.402712
	0.862968	0.140322	0.379069
	0.501876	0.544402	0.826136
	0.276193	1.27733	0.929305
	0.574954	2.00382	0.81109
	0.508324	1.54385	0.000781722
	0.379362	1.42564	0.636992
	0.325628	0.406843	0.776701
	0.52122	0.258537	0.864824
	0.430947	1.29023	0.770253
	0.379362	0.241342	0.344679
	0.48683	1.3977	0.413459
	0.643733	0.61963	0.460745
	0.418051	0.929138	0.753058
	0.82213	0.144621	0.776701
	1.12483	0.94664	0.509203
	1.06465	0.650028	0.655359
	1.19146	0.583398	0.646762
	0.901298	0.396403	0.199695
	0.574596	0.591995	0.947672
	0.79383	0.688716	0.41893
	1.01951	0.74245	0.636015
	1.01521	0.703762	0.255578
	1.0668	0.237351	0.48556
	1.02811	0.460884	0.724139
	0.957182	0.338371	0.859549
	0.890552	0.626385	0.279221
	0.884103	0.34052	0.25128
	0.656271	0.362014	0.593028
	0.42629	0.884308	0.461917
	1.03456	0.544709	0.631716
	0.699258	0.458735	0.582281
	0.596089	0.544709	0.214741
	0.847564	0.452287	0.633866
	0.66057	1.25615	0.421079
	1.33991	0.71305	0.368347
	1.8966	0.98172	0.645614
	0.798272	0.515309	0.482263
	0.781077	0.399244	0.978765
	1.31197	0.575491	0.916433
	0.933682	1.2332	0.533847
	0.523154	0.704453	0.643465
	1.0347	0.590537	0.473665
	0.927234	0.751739	0.501607
	0.968072	0.657167	0.604776
	1.00246	0.356256	0.570386
	1.31197	0.556147	0.432827
	1.00676	0.665764	0.649913
	0.763883	1.18376	0.72729
	0.948728	0.721648	0.89279
	0.929383	0.783979	0.366197
	1.0261	1.09349	0.916433
	0.632772	0.921538	0.957271
	1.00246	1.35356	0.677854
	1.03685	1.34066	0.957271
