# Supplementary material for: The KASH5 protein involved in meiotic chromosomal movements is a novel dynein activating adaptor
Source: eLife. 2022 Jun 15;11:e78201. doi: 10.7554/eLife.78201 (PMC9242646; doi:10.7554/eLife.78201)
Supplement: Figure 6—source data 1. [file elife-78201-fig6-data1.xlsx]

## Sheet: Figure 6B
Figure 6B Relative p150 focus intensity (A.U.)
No GFP	WT	L147D	F167D	M171D
0.830547	0.869567	0.117937	0.933592	0.838831
0.823389	0.923252	0.216956	0.987277	0.947394
0.758967	1.02346	1.55073	0.999207	1.05357
0.986831	0.647668	0.292115	1.18651	0.42963
0.774476	1.05329	0.752615	0.49576	0.972447
0.755388	0.924445	0.777668	0.802362	0.620511
0.973708	1.04136	0.453171	0.684254	1.34586
0.986831	0.88269	0.440048	1.41557	0.738618
0.568087	0.922059	0.360117	1.04096	0.610967
1.17771	0.605913	0.0785678	1.04335	0.715951
1.04171	0.886269	0.255132	0.77373	0.880586
0.939111	0.790829	0.467487	0.875135	0.811392
0.615807	0.795601	0.438855	1.05051	1.2194
0.597912	0.710898	0.731141	1.18532	1.30529
0.847249	0.66437	0.639279	1.48953	0.386682
0.991603	0.924445	0.695351	0.777309	0.329418
1.1288	0.88269	0.592752	1.22588	0.606195
1.03694	0.793215	0.955425	0.853661	0.63602
0.597912	0.972165	0.494926	0.951487	1.07505
1.17771	0.228924	0.562927	0.548252	0.63602
1.44488	1.45382	0.504939	0.846734	1.25835
1.37091	0.761882	1.88763	1.61503	0.881365
0.941429	2.2758	1.64426	1.23804	1.15576
0.68374	1.90955	0.662415	1.28457	1.44446
1.00347	1.58148	0.595607	1.18913	0.966068
1.17168	1.18421	0.828243	1.13544	0.988735
0.294821	0.869252	0.322409	1.49454	2.08033
1.48663	1.18421	0.56101	1.01853	1.27267
0.98557	0.78097	0.347462	1.28934	1.30965
0.69567	0.476754	1.68721	1.07221	0.715537
0.757706	1.11024	0.359392	1.19748	1.7284
0.772022	1.16512	0.833015	0.835997	1.5232
1.31007	1.68646	0.472728	1.05312	1.37765
0.841217	1.04701	0.464377	0.926665	1.80236
1.25757	1.17108	0.793646	0.999439	1.3359
0.644371	1.18421	0.0897735	1.24758	1.45162
1.17884	0.981395	0.615888	0.677328	1.19274
1.0834	0.569808	0.611116	1.36688	1.29534
0.641985	1.52183	0.978561	0.935017	0.91119
1.21463	1.17108	1.12291	0.577115	1.24762
0.957054	0.502917	0.66437	1.02704	0.681735
1.23025	1.11254	0.998411	0.335102	0.608961
0.8127	0.660394	1.0342	0.169274	0.728262
0.774524	0.282212	0.395945	0.988867	0.791491
0.750664	0.569726	1.56747	0.933989	1.36055
0.890245	0.183192	1.00915	0.0284997	0.412116
0.792419	0.00662785	1.31575	0.385208	0.65191
0.53473	1.11612	0.737144	0.209836	0.653103
0.484624	0.834572	1.05448	0.274258	0.761666
0.547853	1.10419	0.65244	1.02704	0.31429
0.791226	0.421793	0.824233	0.492578	0.643559
1	1.10658	0.498543	0.1478	0.668612
0.696979	0.715272	0.844514	1.21315	0.569592
0.699365	0.586428	1.05448	0.514052	0.63998
0.784068	0.566146	1.33603	0.152572	0.390642
0.683856	0.827414	1.52453	0.891041	0.681735
1.04295	0.531549	0.95427	0.935182	0.527837
0.964212	1.06005	0.684651	0.875532	0.686507
0.867578	1.12805	0.802759	0.202678	0.620892
0.957054	0.631762	1.08073	0.484227	0.492047
0.857106	0.530887	1.13958	1.08235	1.22561
0.790298	0.56787	0.699365	1.39015	1.52983
0.775982	0.656152	0.74112	2.2515	0.916624
1.00742	0.362673	1.01074	0.407112	0.856974
0.886931	0.270812	0.46315	0.95828	1.66702
1.079	0.479587	0.878316	0.762627	1.01087
0.682928	0.610818	1.20758	0.514483	0.839079
0.945388	0.664503	0.818666	1.18614	1.03354
1.09571	0.536852	0.581258	0.718486	0.996555
0.959705	0.845839	0.836561	0.48943	1.05143
0.551697	0.836295	0.532345	1.29113	1.47256
0.57675	0.298251	0.634943	0.885507	1.21487
0.822509	0.50464	0.701751	1.02032	1.46063
0.957319	0.998544	1.13243	1.10263	0.743638
0.790298	0.60366	0.664768	1.58461	0.717392
0.886931	0.443797	1.20997	1.03583	0.908273
0.750929	0.479587	1.15867	0.879542	1.04189
1.34385	0.74682	0.760208	0.781716	1.11108
0.876194	0.645415	0.903369	1.08235	1.13494
0.836825	0.848225	1.02506	1.01674	1.08842
0.855384	0.784068	0.115721	0.275258	1.09247
1.33616	0.87593	0.268426	0.469718	1.1545
0.546396	0.924843	0.181337	0.425577	0.35161
0.817207	0.738734	0.0858963	0.145221	0.820461
0.831523	0.757822	0.464078	1.05429	0.844321
0.610818	0.837754	0.340006	0.216801	0.870567
0.606046	1.08351	0.163441	0.420805	0.961235
0.676433	1.32927	0.126458	0.626001	0.603334
0.918613	1.50345	0.18253	1.47661	1.15092
0.879244	1.60843	0.0847032	0.578281	1.04832
0.668082	1.17776	0.343585	0.288381	1.0006
0.601274	0.835368	0.219513	0.667756	0.831198
0.75875	1.1873	0.307795	0.317013	0.913515
0.590537	0.587223	0.165827	0.521017	1.25949
0.653766	0.692207	0.347164	0.328943	1.02924
0.665696	0.68147	0.172986	0.340873	1.26307
1.14886	0.844912	0.159862	0.31582	0.963621
0.868507	0.784068	0.391305	0.671335	1.08531
0.936508	0.775717	0.158669	0.914708	1.1712
0.616783	0.968984	0.330462	0.818075	0.896813
0.797608	1.85655	0.595176	0.735089	0.528368
0.803573	0.787621	0.228924	0.801898	0.7276
1.07438	0.674286	0.374471	0.545402	0.895813
1.35355	1.05724	0.312434	0.424908	0.932796
1.14835	1.66448	0.286188	0.884215	0.91848
1.01593	1.43661	0.582053	1.2111	0.755039
1.56829	1.65016	0.982902	0.834109	0.774127
1.02905	1.15745	0.996025	0.658737	1.03182
1.65418	1.61795	0.670335	0.83053	0.707319
1.99896	1.20994	1.04852	1.01067	0.796794
0.598376	1.41156	0.481841	0.74344	0.920866
1.45018	1.40082	0.337487	0.665895	0.642896
1.73412	1.38651	0.0869567	0.649193	0.682266
0.938382	2.4459	0.0821847	0.408206	1.26207
1.28555	2.33853	0.65244	0.884215	1.40284
1.54323	1.57142	0.331522	0.694527	0.957849
1.69713	1.10735	0.283802	0.956988	1.33484
2.01566	0.830569	0.642896	0.545402	0.682266
1.33923	1.39844	0.351803	0.62414	1.02585
0.745115	0.575266	0.642896	1.20871	1.06761
1.8417	0.637405	1.31151	2.01157	0.869435
1.33587	0.611159	1.98078	0.677797	0.857505
2.03735	0.615931	1.17312	1.73718	0.735818
1.25713	0.644563	1.95812	1.22658	1.03646
1.40625	0.742389	0.40244	1.2743	1.49218
1.06863	0.669616	1.64436	1.15261	0.393426
1.06386	0.936849	0.0910659	0.983205	0.973226
1.47068	0.587299	0.256893	1.33276	0.962489
1.40864	0.421471	1.29719	1.19198	0.738204
0.981544	0.650528	2.3196	1.49142	0.816943
1.49096	0.776986	1.26975	1.40553	0.956524
1.0054	0.686318	0.0516968	1.41746	0.674975
1.25713	0.818741	0.979854	1.44967	0.814557
1.29411	0.61951	0.866518	1.6656	1.22137
1.06863	0.855724	1.2447	1.84694	0.468586
1.02449	0.602808	1.65271	1.15977	0.915962
1.3979	0.60758	1.54414	1.59044	0.857505
1.30246	0.590878	1.27333	1.16216	0.667817
2.03735	0.837829	2.14422	0.865098	0.682133
1.74507	0.644563	1.81496	1.36019	0.623676

## Sheet: Figure 6D
	Figure 6D Relative GFP focus intensity (A.U.)
	WT	L147D	F167D	M171D
	0.958115	0.321903	0.374265	0.389205
	0.87775	0.307221	0.299309	0.445615
	0.769566	0.333494	0.365765	0.305749
	0.87775	0.486497	0.39822	0.415478
	0.933388	0.491906	0.323264	0.219201
	0.76493	0.30413	0.378902	0.42166
	0.48056	0.35204	0.388947	0.427069
	0.653655	0.279402	0.34181	0.189064
	0.6297	0.385268	0.390493	0.236202
	0.734793	0.200582	0.424493	0.33434
	0.672973	0.498861	0.539632	0.437115
	0.758748	0.348949	0.386629	0.293385
	0.54238	0.297948	0.37272	0.212247
	0.631245	0.284811	0.522632	0.311158
	0.59029	0.412314	0.482449	0.257066
	0.594153	0.201355	0.44613	0.228474
	0.612699	0.232264	0.328673	0.472661
	0.594926	0.391449	0.422948	0.293385
	0.814385	0.390677	0.390493	0.205292
	0.575608	0.311084	0.385084	0.311158
	1.70467	0.837052	1.13902	1.42614
	1.42339	0.518682	1.27812	0.776264
	1.77035	0.511728	1.03316	1.04209
	1.10734	0.371088	1.61117	0.821855
	1.31444	0.519455	1.26962	0.712899
	1.28894	0.4785	0.901018	1.35273
	1.17457	0.371088	0.79438	1.0305
	1.1823	0.890372	1.16221	0.923857
	0.853108	0.485454	1.47439	0.865902
	1.0687	0.365679	1.66294	0.984131
	1.44426	0.462272	1.22171	1.04209
	1.21398	0.540319	1.00225	1.07454
	1.17921	0.523319	0.880927	0.882129
	1.3778	0.59982	1.00379	0.812582
	0.970565	0.393498	1.25184	1.26386
	1.33762	0.565047	0.61974	1.09
	1.34921	0.390407	0.901018	0.950131
	0.850017	0.429044	1.09343	1.52351
	1.36775	0.417453	0.860836	1.10622
	1.32062	0.481591	0.798243	1.07686
	1.04604	0.88625	1.2035	2.15226
	1.04372	0.709292	1.20273	2.0804
	0.838171	0.617336	1.35419	2.52936
	0.852853	0.50297	1.39901	1.97685
	0.673577	1.09721	1.31478	1.70871
	0.864444	0.774203	1.10459	2.41345
	0.77867	1.39935	1.36346	1.9243
	0.835853	1.01916	1.35264	1.80684
	0.790261	0.67761	1.09918	1.86325
	0.913127	0.861523	1.07446	1.90035
	0.935537	1.00989	1.19655	2.06571
	0.921627	0.776521	1.23982	1.8138
	0.903854	0.906342	0.967045	2.56104
	0.498164	1.09953	1.23364	1.74734
	0.658122	0.963525	1.5041	2.47913
	0.549165	0.839886	1.35883	2.05721
	0.719169	1.18839	1.3936	1.45447
	0.77017	1.08562	1.09223	2.14917
	0.596303	1.11885	1.34646	1.93898
	0.872172	0.795839	1.29701	2.44822
	2.16171	0.392296	0.875228	0.352511
	2.18411	0.258611	0.879092	0.35792
	1.65092	0.47807	0.648814	0.382648
	2.12152	0.399251	1.00969	0.394239
	1.84411	0.314249	0.924684	0.395785
	1.27846	0.392296	1.14414	0.372603
	1.50101	0.258611	0.847409	0.452968
	1.63315	0.447933	0.964093	0.602107
	2.60449	0.380705	0.612495	0.424376
	2.22893	0.311931	1.10473	0.323147
	1.56747	0.318113	0.959457	0.544152
	2.09293	0.313476	0.971821	0.378012
	1.50874	0.544526	0.953275	0.346329
	2.50326	0.296476	0.889137	0.336284
	2.26139	0.315022	0.893001	0.420513
	1.47396	0.369886	0.640314	0.381875
	1.31246	0.245475	1.05064	0.420513
	2.36185	0.333567	0.98573	0.313874
	1.73206	0.342068	0.869046	0.481559
	2.03266	0.402342	0.940911	0.327011
	2.59616	0.842633	0.899402	1.06364
	2.60311	1.02268	1.17682	0.857315
	2.60311	1.28001	0.999859	0.858088
	2.91994	1.161	0.896311	1.29237
	2.73834	1.20119	0.778855	1.33951
	2.79166	1.11232	0.567123	0.925317
	2.13947	1.16719	1.02072	0.9995
	2.00656	1.61074	0.644397	1.01186
	1.75619	1.29237	1.13741	1.34878
	3.23444	1.10305	0.911766	0.992545
	1.72141	0.898271	0.723217	1.25605
	2.34579	1.65556	0.803582	1.13937
	2.68116	1.08759	0.924903	0.736767
	2.3682	1.25064	1.10186	1.4361
	3.05903	1.10768	0.999859	1.27769
	2.4447	1.12623	0.744854	0.832588
	2.67884	1.13396	1.01918	0.96009
	2.8048	1.00259	1.13741	1.25605
	2.07147	1.26919	0.887039	0.965499
	2.34965	0.990227	0.790446	1.13937
	0.493096	2.25166	0.796628	0.3528
	0.345502	2.49971	0.59726	0.54985
	0.194044	1.99279	0.842992	0.3698
	0.362502	2.26557	0.894766	0.341209
	0.374093	2.36062	1.0555	0.387574
	0.281364	2.1543	0.766491	0.511985
	0.289092	2.29494	0.730172	0.39221
	0.423549	3.13259	1.0385	0.375982
	0.21259	2.52212	0.919494	0.549077
	0.290637	2.03452	1.11732	0.429302
	0.366366	2.34053	1.03772	0.247707
	0.275955	2.81886	0.607306	0.380619
	0.297592	3.1295	0.759536	0.387574
	0.236545	2.41162	0.560168	0.321118
	0.248909	2.16666	0.728626	0.27398
	0.358639	2.31194	1.15904	0.44862
	0.411958	3.26473	0.842219	0.402256
	0.267455	2.60867	0.893221	0.412301
	0.329274	2.1118	1.05704	0.355118
	0.323865	2.31194	0.853811	0.27939
	0.448867	1.59398	0.991816	1.39008
	0.7371	2.11326	1.02813	1.67368
	0.802783	2.01126	0.957042	1.65513
	0.791192	1.66661	1.03432	0.955797
	0.484413	1.65348	1.08686	0.618881
	0.548551	1.54066	0.999543	1.53458
	0.612689	2.0638	0.732174	1.47122
	0.825193	1.00283	0.926132	1.42176
	0.637416	1.35288	1.13091	1.58249
	0.613461	1.03451	0.892132	1.52454
	0.832148	1.45256	1.26382	1.36999
	0.543914	2.70673	1.23446	1.48281
	0.811283	1.2447	0.80713	1.43103
	0.44114	1.67666	0.938496	1.54076
	0.652871	1.8428	0.968633	1.61263
	0.498323	1.42629	0.91145	1.51372
	0.459685	1.7238	0.970951	1.48049
	0.651326	1.57543	1.38901	1.48126
	0.458913	2.04526	1.22209	1.53458
	0.542369	1.36215	1.16259	1.3383
	0.450252	0.891316	2.35008	1.22068
	0.544526	1.11618	1.59511	1.60937
	0.655028	1.05823	1.6237	1.01513
	0.267884	1.91056	2.62827	0.855169
	0.429387	1.08682	2.60509	0.991172
	0.273293	1.31942	2.41963	0.980353
	0.488889	1.13859	2.85778	0.823486
	0.660438	1.05205	2.16694	0.968762
	0.590891	0.835679	0.884962	0.954853
	0.440206	0.857315	1.53407	0.930125
	0.450252	0.852679	2.13835	0.965671
	0.619482	1.15714	1.84625	0.981899
	0.480389	1.27228	1.72184	1.17277
	0.209928	0.835679	1.6237	1.14186
	0.175155	0.96009	2.68545	1.19981
	0.248566	1.06209	2.47527	1.01513
	0.267884	0.908316	1.60593	1.22068
	0.266339	0.88127	1.2837	0.894579
	0.309612	0.634765	1.87639	1.03676
	0.175155	1.09687	1.88841	1.23536
	0.271233	0.359325	0.440635	0.572517
	0.410326	0.343871	0.212676	0.482878
	0.372462	0.300597	0.594411	0.30592
	0.240323	0.285915	0.53491	0.57638
	0.660695	0.285142	0.193357	0.627381
	0.575693	0.202459	0.762869	0.450423
	0.442009	0.285142	0.497818	0.399422
	0.509238	0.358553	0.238949	0.526152
	0.465964	0.208641	0.454545	0.481333
	0.483737	0.538602	0.245904	0.417195
	0.528556	0.256551	0.349452	0.48906
	0.282051	0.302915	0.636912	0.499879
	0.701651	0.285915	0.472318	0.539289
	0.632876	0.197822	0.525637	0.75102
	0.799016	0.272778	0.593638	0.688428
	0.499192	0.257323	0.600593	0.492151
	0.629785	0.390235	0.320087	0.48056
	0.377871	0.461328	0.460727	0.621972
	0.465964	0.354689	0.313133	0.390922
	0.474464	0.265051	0.259041	0.468969
